1  **$\alpha_{1A}$ -adrenoceptor inverse agonists and agonists modulate receptor signalling through a**  
2 **conformational selection mechanism**

3

4 Feng-Jie Wu<sup>1,2,3</sup>, Lisa M. Williams<sup>3</sup>, Alaa Abdul-Ridha<sup>3</sup>, Avanka Gunatilaka<sup>3</sup>, Tasneem M.  
5 Vaid<sup>1,2,3</sup>, Martina Kocan<sup>3</sup>, Alice R. Whitehead<sup>3</sup>, Michael D.W. Griffin<sup>1,2</sup>, Ross A.D.  
6 Bathgate<sup>1,3</sup>, Daniel J. Scott<sup>1,3\*</sup>, Paul R. Gooley<sup>1,2\*</sup>

7

8 <sup>1</sup>Department of Biochemistry and Molecular Biology, University of Melbourne, Parkville,  
9 3052, VIC, Australia.

10 <sup>2</sup>Bio21 Molecular Science and Biotechnology Institute, University of Melbourne, Parkville,  
11 3052, VIC, Australia.

12 <sup>3</sup>The Florey Institute of Neuroscience and Mental Health, University of Melbourne, Parkville,  
13 3052, VIC, Australia.

14

15 **Correspondence to:**

16 Paul R. Gooley  
17 Department of Biochemistry and Molecular Biology  
18 The University of Melbourne  
19 Bio21 Molecular Science and Biotechnology Institute  
20 Phone: +61 (0)3 8344 2273  
21 Email: [prg@unimelb.edu.au](mailto:prg@unimelb.edu.au)

22

23 Daniel J. Scott  
24 The Florey Institute of Neuroscience and Mental Health  
25 The University of Melbourne  
26 Phone: +61 (0)3 9035 7584  
27 Email: [daniel.scott@florey.edu.au](mailto:daniel.scott@florey.edu.au)

28

29

30 **Abstract**

31 G-Protein Coupled Receptors (GPCRs) transmit signals across the cell membrane via  
32 an allosteric network from the ligand-binding site to the G-protein binding site via a series of  
33 conserved microswitches. Crystal structures of GPCRs provide snapshots of inactive and  
34 active states, but poorly describe the conformational dynamics of the allosteric network that  
35 underlies GPCR activation. Here we analyse the correlation between ligand binding and  
36 receptor conformation of the  $\alpha_{1A}$ -adrenoceptor, known for stimulating smooth muscle  
37 contraction in response to binding noradrenaline. NMR of  $^{13}\text{C}^\epsilon\text{H}_3$ -methionine labelled  $\alpha_{1A}$ -  
38 adrenoceptor mutants, each exhibiting differing signalling capacities, revealed how  
39 different classes of ligands modulate receptor conformational equilibria.  $^{13}\text{C}^\epsilon\text{H}_3$ -methionine  
40 residues near the microswitches revealed distinct states that correlated with ligand efficacies,  
41 supporting a conformational selection mechanism. We propose that allosteric coupling  
42 between the microswitches controls receptor conformation and underlies the mechanism of  
43 ligand modulation of GPCR signalling in cells.

44

45

46

47

48

49 **Introduction**

50 G-protein coupled receptors (GPCRs) are integral membrane proteins sharing a common  
51 seven-helix transmembrane domain (TMD). Conformational changes to the TMD are  
52 required to transmit the extracellular stimuli intracellularly to activate signalling pathways.  
53 Over the past 20 years X-ray crystal structures, and more recently cryo-EM structures, have  
54 revealed a plethora of structural details on how functionally different ligands interact with  
55 GPCRs and the conformational changes they induce. Most structures solved to date are of  
56 GPCRs in inactive states, bound to inverse agonists or antagonists (Manglik and Kruse,  
57 2017). A few have been crystalized with agonist alone (Manglik and Kruse, 2017), with  
58 resultant structures similar to antagonist bound inactive states. Complexes of GPCRs with  
59 active-state-stabilising nanobodies, engineered mini G proteins, G $\alpha$  C-terminal peptide or  
60 heterotrimeric G proteins appear necessary to stabilise agonist bound GPCRs in active states  
61 for X-ray and cryo-EM structure determination (Carpenter and Tate, 2017). Using these tools,  
62 several active state GPCR structures have been solved (Carpenter and Tate, 2017; Garcia-  
63 Nafria and Tate, 2019; Manglik and Kruse, 2017), revealing conserved conformational  
64 changes that occur upon receptor activation. These include rearrangements in the ligand  
65 binding site and a large outward movement at the cytoplasmic side of transmembrane (TM)  
66 helix 6 (TM6) to accommodate G protein binding. While providing a wealth of structural  
67 detail of static receptor conformations, these structures generally do not provide insight into  
68 GPCR signalling complexities such as basal receptor activity, partial agonism and biased  
69 agonism.

70 To address this shortfall, spectroscopic techniques, supported by molecular dynamic  
71 simulations, have given insight into the conformational dynamics that underlie the activity of  
72 a few diffusible ligand-activated GPCRs including  $\beta_2$  adrenergic receptor ( $\beta_2$ -AR) (Bokoch

73 et al., 2010; Eddy et al., 2016; Horst et al., 2013; Kofuku et al., 2012; Kofuku et al., 2014;  
74 Liu, 2012; Manglik et al., 2015; Nygaard et al., 2013),  $\beta_1$  adrenergic receptor ( $\beta_1$ -AR) (Isogai  
75 et al., 2016; Solt et al., 2017), adenosine  $A_{2A}$  receptor ( $A_{2A}$ R) (Clark et al., 2017; Eddy et al.,  
76 2018; Ye et al., 2018; Ye et al., 2016),  $\mu$  opioid receptor ( $\mu$ OR) (Okude et al., 2015; Sounier  
77 et al., 2015), leukotriene B4 receptor (BLT2)(Casiraghi et al., 2016), and the M2 muscarinic  
78 acetylcholine receptor (M2R) (Xu et al., 2019). By far the most studied receptor in this regard  
79 is  $\beta_2$ -AR, for which  $^{13}\text{C}^\epsilon\text{H}_3$ -methionine labelling NMR (Bokoch et al., 2010; Kofuku et al.,  
80 2012; Kofuku et al., 2014; Nygaard et al., 2013),  $^{19}\text{F}$  NMR(Eddy et al., 2016; Horst et al.,  
81 2013; Liu, 2012; Manglik et al., 2015) and electron paramagnetic resonance (EPR) (Manglik  
82 et al., 2015) have been applied to characterise the conformational signatures of this receptor  
83 when bound to various ligands and a G protein mimetic nanobody. These studies reveal that  
84 GPCRs are highly dynamic, sampling inactive and active conformational states, and are  
85 thought to predominantly function via a conformational selection mechanism (Shimada et al.,  
86 2018). Such a mechanism posits that a GPCR constantly samples various inactive and active  
87 conformations, all existing in equilibrium. Ligands preferentially bind to particular receptor  
88 states, depending on their pharmacological characteristics, thus shifting the conformational  
89 equilibrium towards these preferred states and modulating the signalling output of the system.  
90 The extracellular orthosteric ligand binding site in adrenoceptors is connected to the  
91 intracellular G protein binding site through a series of conserved microswitches (Ahuja and  
92 Smith, 2009; Deupi and Standfuss, 2011; Trzaskowski et al., 2012) (Figure 1): a central  
93 transmission switch (also called the connector region, CWxP motif or PIF motif (Latorraca et  
94 al., 2017)), the NPxxY switch, and the intracellular G protein binding site, characterized by  
95 the DRY motif (or switch). How these microswitches coordinate the transmission of the  
96 extracellular signal is not clear, but molecular dynamics (MD) simulations and NMR data  
97 have led to a mechanistic description of “loose allosteric coupling” (Latorraca et al., 2017).

98

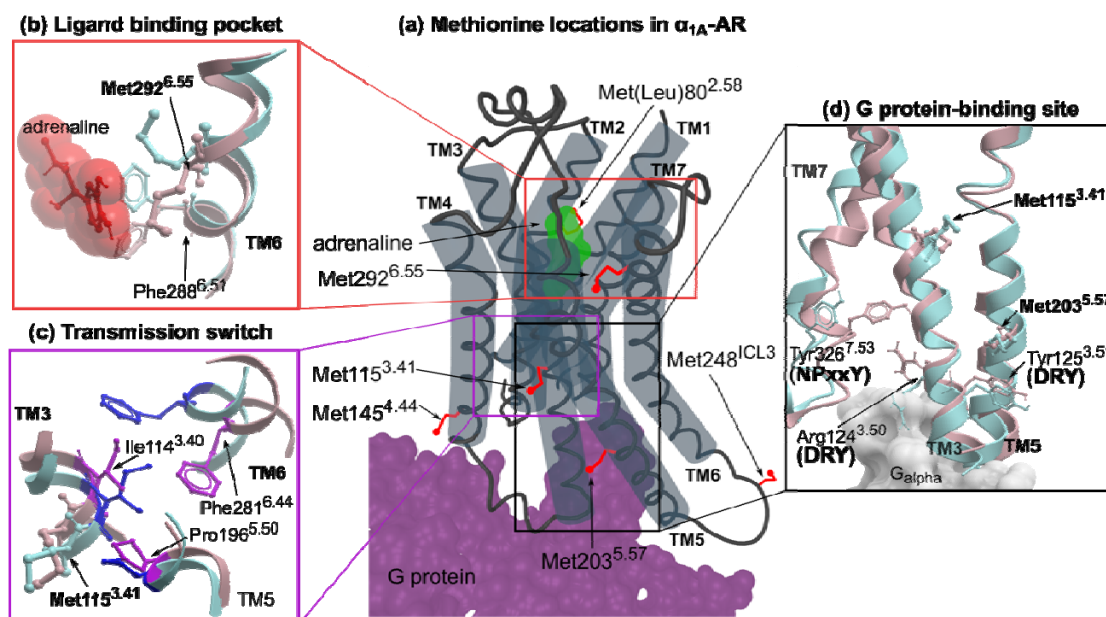

99

100 **Figure 1. Methionine residues in  $\alpha_{1A}$ -AR.** (a) The location of six methionines on a cartoon  
101 representation of  $\alpha_{1A}$ -AR. Methionine sidechains are highlighted as red sticks. Bound adrenaline and  
102 G protein are coloured in green and purple respectively. (b-d) Homology models of  $\alpha_{1A}$ -AR-A4 in the  
103 inactive state (blue; modeled on the X-ray crystal structure of inactive  $\beta_2$ -AR, pdb id: 5jqh) and  
104 active state (pink; modeled on the X-ray crystal structure of active  $\beta_2$ -AR, pdb id: 3sn6) are  
105 superimposed showing inferred conformational changes that occur in the ligand binding pocket (b),  
106 transmission switch (c) and G protein binding site (d).

107

108 This mechanism refers to each microswitch as conformationally independent from the others,  
109 that is an active DRY motif state is not significantly dependent on an active state in the  
110 transmission switch. That said, an active state in the transmission switch does increase the  
111 probability of the DRY motif (and thus the receptor) to sample active states (thus, loose  
112 allosteric coupling) (Latorraca et al., 2017). Put simply, the conformational changes that  
113 occur in the microswitches are thought to drive the overall equilibrium state of the receptor

114 system. Despite recent work, it is not well understood how the binding of ligands such as  
115 inverse agonists influence the microswitch state equilibria to decrease basal receptor activity.

116  $\alpha_1$ -adrenoceptors ( $\alpha_1$ -ARs) comprise three G<sub>q</sub>-coupled GPCR subtypes ( $\alpha_{1A}$ -,  $\alpha_{1B}$ - and  
117  $\alpha_{1D}$ -AR) that bind and sense the endogenous catecholamines, adrenaline and noradrenaline,  
118 to modulate a range of physiological processes. In the periphery, postsynaptic  $\alpha_1$ -AR  
119 stimulation by catecholamines mediates smooth muscle contraction, thus  $\alpha_1$ -AR antagonists  
120 and inverse agonists are clinically prescribed to treat hypertension and benign prostatic  
121 hyperplasia (BPH) (Akinaga et al., 2019).  $\alpha_1$ -ARs are also widely expressed in the central  
122 nervous system (CNS), but the lack of subtype-selective antibodies and ligands limits the  
123 understanding of their role in neuroplasticity and neurodegeneration (Perez and Doze, 2011).  
124 Currently there are no available crystal structures of an  $\alpha_1$ -AR family member, which limits  
125 the rational design of more selective compounds to probe the physiological role of  $\alpha_{1A}$ -AR in  
126 the CNS.

127 Recombinant  $\alpha_{1A}$ -AR expresses poorly and the resultant protein is particularly  
128 unstable when purified in detergent (Scott and Pluckthun, 2013), which has hindered  
129 biochemical studies of this GPCR. Recently, we engineered an  $\alpha_{1A}$ -AR variant,  $\alpha_{1A}$ -AR-A4,  
130 that can be expressed in *Escherichia coli* (*E. coli*) and exhibits improved stability when  
131 purified in detergents (Yong et al., 2018). When expressed in COS-7 cells  $\alpha_{1A}$ -AR-A4  
132 exhibits no signalling efficacy in response to adrenaline stimulation (Yong et al., 2018). In  
133 the present study,  $\alpha_{1A}$ -AR-A4 was labelled with  $^{13}\text{C}^\epsilon\text{H}_3$ -methionine at the five naturally  
134 occurring methionine residues, providing NMR probes to assess how inverse agonists, partial  
135 agonists and full agonists influence receptor conformational equilibria. Three of these  
136 methionines are excellent probes of the ligand-binding site and the microswitches proposed to  
137 be markers of signal transmission: Met292<sup>6.55</sup> (superscript denotes GPCRdb numbering  
138 (Isberg et al., 2015)) is located in the ligand binding site; Met115<sup>3.41</sup> is proximal to the

139 transmission switch (Ile114<sup>3.40</sup>, Pro196<sup>5.50</sup>, Leu197<sup>5.51</sup>, Phe281<sup>6.44</sup>, Trp285<sup>6.48</sup>); and Met203<sup>5.57</sup>  
140 sits above the tyrosine of the DRY motif (Asp130<sup>3.49</sup>, Arg131<sup>3.50</sup>, Tyr132<sup>3.51</sup>). Using the  
141 inactive  $\alpha_{1A}$ -AR variant,  $\alpha_{1A}$ -AR-A4, and by reverse mutation to an active receptor ( $\alpha_{1A}$ -AR-  
142 A4-active) we show that for Met115<sup>3.41</sup> and Met203<sup>5.57</sup> the chemical shifts and line-widths of  
143 the  $^{13}\text{C}^\epsilon\text{H}_3$  groups are dependent on ligand efficacy (from strong inverse agonist to full  
144 agonist), suggesting that  $\alpha_{1A}$ -AR activation proceeds primarily through a conformational  
145 selection mechanism.

146

## 147 **Results**

### 148 **$^{13}\text{C}^\epsilon\text{H}_3$ methionine labelling and NMR signal assignment**

149  $\alpha_{1A}$ -AR-A4 is a thermostabilised variant of the human  $\alpha_{1A}$ -AR that contains 15 amino acid  
150 substitutions over wild type (WT) human  $\alpha_{1A}$ -AR (Supplementary Figure 1). Excluding  
151 Met1,  $\alpha_{1A}$ -AR-A4 possesses six methionine residues, five of which are naturally occurring  
152 (Met115<sup>3.41</sup>, Met145<sup>4.44</sup>, Met203<sup>5.57</sup>, Met248<sup>ICL3</sup>, Met292<sup>6.55</sup>) and one, Met80<sup>2.58</sup>, is a  
153 thermostabilising mutation previously selected for (Yong et al., 2018) (Supplementary Figure  
154 1). Homology models of  $\alpha_{1A}$ -AR (Figure 1) built on in inactive- and active-states of X-ray  
155 structures of  $\beta_2$ -AR show that three of these methionines were particularly interesting as  
156 conformational probes as they are located either within the adrenaline binding site  
157 (Met292<sup>6.55</sup>), immediately adjacent to the highly conserved Ile114<sup>3.40</sup> of the transmission  
158 switch (Met115<sup>3.41</sup>), or sitting above Tyr125<sup>3.51</sup> of the DRY motif within the G protein  
159 binding site (Met203<sup>5.57</sup>). These homology models of  $\alpha_{1A}$ -AR suggest that each of these  
160 regions undergo significant local rearrangements between inactive to active conformations  
161 (Figure 1).

162  $\alpha_{1A}$ -AR-A4 was expressed and labelled with  $^{13}\text{C}^\epsilon\text{H}_3$ -methionine using an adapted *E.*  
163 *coli* methionine biosynthesis pathway inhibition protocol that we have previously used to

164 generate  $^{13}\text{C}^{\epsilon}\text{H}_3$ -methionine-labeled neurotensin receptor 1 (NTS<sub>1</sub>) samples labelled with  
165 96% incorporation efficiency(Bumbak et al., 2019; Bumbak et al., 2018). Using this method  
166  $\alpha_{1A}$ -AR-A4 expressed well and could be purified, solubilized in n-dodecyl  $\beta$ -D-  
167 maltopyranoside (DDM), with a yield of (0.5-1 mg/L culture). 40-60  $\mu\text{M}$  samples of  $^{13}\text{C}^{\epsilon}\text{H}_3$ -  
168 methionine-labeled  $\alpha_{1A}$ -AR-A4 were subsequently used to record 2D  $^1\text{H}$ - $^{13}\text{C}$  SOFAST-  
169 heteronuclear multiple quantum coherence (HMQC) spectra in the apo state, and in the bound  
170 states for prazosin (full inverse agonist), WB-4101 (partial inverse agonist), phentolamine  
171 (partial inverse agonist), silodosin (or KMD-3213, neutral antagonist), oxymetazoline (partial  
172 agonist) and adrenaline (full agonist) (Figure 2 and Supplementary Figure 2). Individual  
173  $^{13}\text{C}^{\epsilon}\text{H}_3$ -methionine resonances were assigned by expressing and analysing  $\alpha_{1A}$ -AR-A4 M80L,  
174  $\alpha_{1A}$ -AR-A4 M115I,  $\alpha_{1A}$ -AR-A4 M203L,  $\alpha_{1A}$ -AR-A4 M248I and  $\alpha_{1A}$ -AR-A4 M292I mutants  
175 in the same way.  $^1\text{H}$ - $^{13}\text{C}$  SOFAST-HMQC spectra enabled clear assignment of mutated  
176 methionines as the remaining five resonances in these spectra showed only small chemical  
177 shift differences in the presence of the mutation (Supplementary Figure 3). The  $^{13}\text{C}^{\epsilon}\text{H}_3$ -  
178 methionine of the apo state of  $\alpha_{1A}$ -AR-A4 showed clear single resonances for each methyl  
179 with no significant heterogeneity, in contrast to many previously studied GPCRs (Casiraghi  
180 et al., 2016; Kofuku et al., 2012; Nygaard et al., 2013; Okude et al., 2015; Solt et al., 2017;  
181 Xu et al., 2019), (Figure 2). Met145<sup>4.44</sup> and Met248<sup>ICL3</sup> exhibited intense signals with  $^1\text{H}$  and  
182  $^{13}\text{C}$  chemical shifts of the methyl group indicative of solvent exposed, unrestrained methyl  
183 groups. Met248<sup>ICL3</sup>, located within ICL3 (Figure 1a), showed strong signal intensity most  
184 likely due to the mobility of this loop and exposure to the bulk solvent. Met145<sup>4.44</sup> is at the C-  
185 terminal intracellular end of TM4, predicted to be exposed on the surface of the helix (Figure  
186 1a) and thus also highly mobile. Met80<sup>2.58</sup> was not unambiguously assigned (Supplementary  
187 Figure 3a,f) as it either is significantly broadened and difficult to resolve in all receptor states  
188 or may overlap with Met145<sup>4.44</sup> and under some conditions with Met292<sup>6.55</sup> (Supplementary



189 Figure 3e). The remaining methionines, Met115<sup>3,41</sup>, Met203<sup>5,57</sup> and Met292<sup>6,55</sup>, were readily  
190 assigned (Supplementary Figure 3b,c,e,g,h,j) and exhibited resolved chemical shifts for the  
191 <sup>13</sup>C<sup>ε</sup>H<sub>3</sub> that were sensitive to the bound ligand (Figure 2b-d).

192

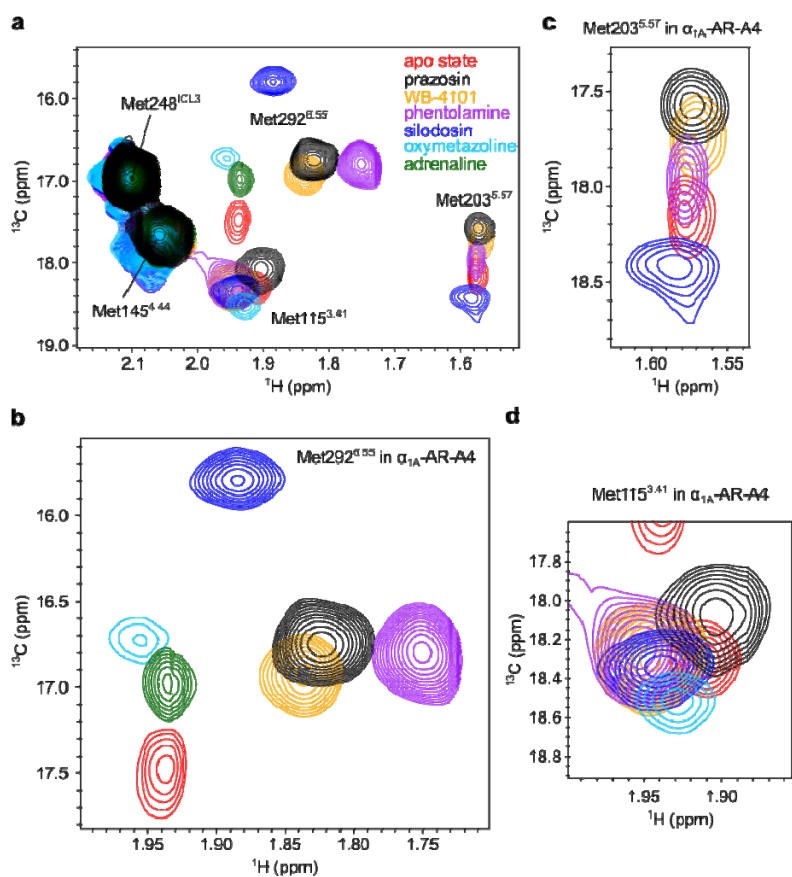

193

194 **Figure 2. <sup>1</sup>H-<sup>13</sup>C SOFAST-HMQC spectra of  $\alpha_{1A}$ -AR-A4.** (a) Overlay of 2D <sup>1</sup>H-<sup>13</sup>C SOFAST-  
195 HMQC spectra for [<sup>13</sup>C<sup>ε</sup>H<sub>3</sub>-Met]  $\alpha_{1A}$ -AR-A4 collected in the apo state (red) and bound to prazosin  
196 (black, inverse agonist), WB-4101 (yellow, inverse agonist), phentolamine (purple, inverse agonist),  
197 silodosin (blue, neutral antagonist), oxymetazoline (cyan, partial agonist) and adrenaline (green, full  
198 agonist). (b) Close-up of the Met292<sup>6,55</sup> resonance. (c) Close-up of the Met203<sup>5,57</sup> resonance. (d)  
199 Close-up of the Met115<sup>3,41</sup> resonance. Spectra were acquired on ~50  $\mu$ M  $\alpha_{1A}$ -AR-A4 dissolved in  
200 0.02-0.1% DDM micelle, pH 7.5 and 25 °C.

201

202           Based on homology models, Met292<sup>6.55</sup> projects into the orthosteric ligand binding  
203 pocket (Figure 1a) and mutational studies support a role for this residue in ligand binding  
204 (Hwa et al., 1995). Thus, the <sup>13</sup>C<sup>ε</sup>H<sub>3</sub> chemical shifts of Met292<sup>6.55</sup> likely reflect a direct  
205 interaction with chemical groups of each ligand. Interestingly, the resonance intensities of  
206 Met292<sup>6.55</sup> increased in the presence of antagonists and inverse agonists relative to the apo  
207 state (Figure 2b), indicating that binding of these ligands reduces conformational dynamics in  
208 the orthosteric binding site. Met115<sup>3.41</sup> and Met203<sup>5.57</sup> are distant from the orthosteric site, but  
209 both the chemical shifts and linewidths of their <sup>13</sup>C<sup>ε</sup>H<sub>3</sub> groups were sensitive to ligand  
210 binding (Figure 2c,d), likely reflecting receptor conformational changes in the transmission  
211 switch and G protein-binding site respectively (Figure 1c,d). The <sup>1</sup>H chemical shift of the  
212 methyl of Met203<sup>5.57</sup> was shifted upfield from typical small-peptide positions (2.1 ppm) to  
213 1.58 ppm in agreement with our models, which predict ring-current induced effects from  
214 Tyr125<sup>3.51</sup> of the DRY motif (Supplementary Figure 4). Met203<sup>5.57</sup> therefore serves as a  
215 probe of conformational change within this region. Indeed, the resonances of the <sup>13</sup>C<sup>ε</sup>H<sub>3</sub> of  
216 Met203<sup>5.57</sup> exhibited a significant linear chemical shift change depending on which ligand  
217 was bound, demonstrating that allosteric coupling between the ligand binding site and the G  
218 protein-binding site is retained in the inactive  $\alpha_{1A}$ -AR-A4 in solution. Such a linear chemical  
219 shift change is also expected for ligands modulating receptor state *via* conformational  
220 selection. We postulate that the Met203<sup>5.57</sup> signal reflects the average, equilibrium signal,  
221 between inactive and active states undergoing fast exchange. Inverse agonists preferentially  
222 bound to inactive states, shifting the Met203<sup>5.57</sup> equilibrium to an upfield position (inactive  
223 state) compared to apo state receptor, which can sample active-like states to a certain degree.

224           We were interested to see if an opposite trend could be observed for receptor agonists,  
225 which we hypothesised would shift the position of the Met203<sup>5.57</sup> resonance downfield. For  
226  $\alpha_{1A}$ -AR-A4 however, the binding of the full agonist adrenaline to  $\alpha_{1A}$ -AR-A4 resulted in

227 complete line broadening of the Met115<sup>3.41</sup> and Met203<sup>5.57</sup> resonances despite the promotion  
228 of a distinct chemical shift for Met292<sup>6.55</sup> in the binding site. Binding of the partial agonist  
229 oxymetazoline resulted in substantial broadening of Met203<sup>5.57</sup> and Met292<sup>6.55</sup>, but not  
230 Met115<sup>3.41</sup>. The loss of these chemical shifts upon agonist binding was likely due to the  
231 significantly weaker agonist affinities at  $\alpha_{1A}$ -AR-A4 compared to unmutated, WT  $\alpha_{1A}$ -AR, as  
232 a result of the F312L stabilizing mutation (Yong et al., 2018). Thus, NMR experiments were  
233 repeated on  $\alpha_{1A}$ -AR-A4 (L312F), for which agonist affinities were largely restored to that of  
234 WT  $\alpha_{1A}$ -AR (Supplementary Figure 5 and Supplementary Table 1) (Yong et al., 2018).

235

### 236 **Agonist induced chemical shifts of Met115<sup>3.41</sup> and Met203<sup>5.57</sup> resonances**

237 Despite the reduced thermostability of  $\alpha_{1A}$ -AR-A4 (L312F) (Yong et al., 2018), we were able  
238 to <sup>13</sup>C<sup>ε</sup>H<sub>3</sub>-methionine-label and record <sup>1</sup>H-<sup>13</sup>C SOFAST-HMQC spectra for this receptor in  
239 the apo state and bound to adrenaline (full agonist), phenylephrine (full agonist), A-61603  
240 (full agonist), and oxymetazoline (partial agonist) in addition to the inverse agonists and  
241 neutral antagonists tested on  $\alpha_{1A}$ -AR-A4 (Figure 3a). Overall the <sup>1</sup>H-<sup>13</sup>C SOFAST-HMQC  
242 spectra of the apo, antagonist and inverse agonist bound states of  $\alpha_{1A}$ -AR-A4 (L312F) were  
243 similar to those of  $\alpha_{1A}$ -AR-A4. Again, single resonances for the <sup>13</sup>C<sup>ε</sup>H<sub>3</sub>-methionine groups of  
244  $\alpha_{1A}$ -AR-A4 (L312F) were observed for all ligands. The chemical shifts of Met292<sup>6.55</sup> induced  
245 by each ligand in  $\alpha_{1A}$ -AR-A4 (L312F) were slightly different to those of  $\alpha_{1A}$ -AR-A4, most  
246 likely due to orthosteric binding site changes after the L312F reversion. Inverse agonist  
247 binding increased the intensity of the Met292<sup>6.55</sup> resonance in  $\alpha_{1A}$ -AR-A4 (L312F), as was  
248 seen with  $\alpha_{1A}$ -AR-A4; whereas the neutral antagonist silodosin significantly decreased the  
249 peak intensity and the partial agonist oxymetazoline and full agonist A-61603 highly  
250 broadened the resonance of Met292<sup>6.55</sup> in  $\alpha_{1A}$ -AR-A4 (L312F) (Supplementary Figure 6).

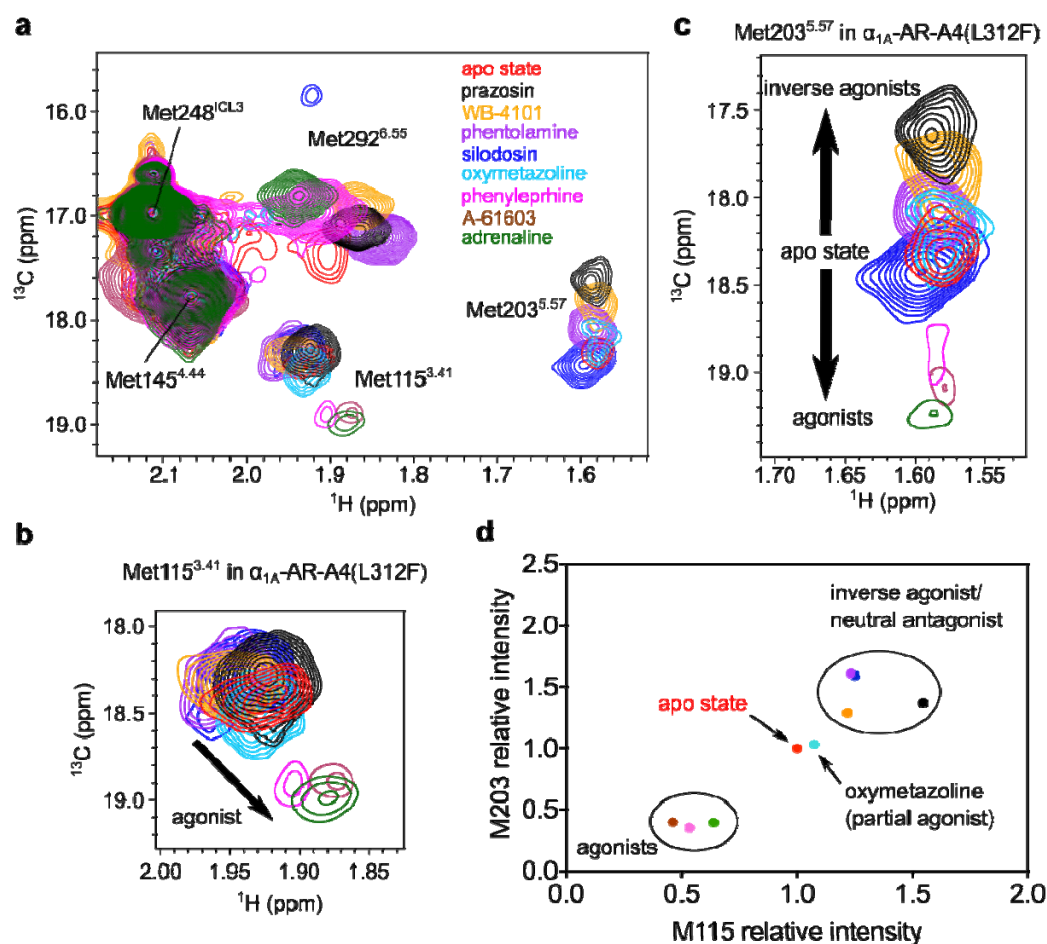

251

252 **Figure 3. Ligand efficacy-dependent chemical shifts of Met115<sup>3.41</sup> and Met203<sup>5.57</sup> resonances.** (a)

253 Overlay of 2D <sup>1</sup>H-<sup>13</sup>C SOFAST-HMQC spectra for [<sup>13</sup>C<sup>6</sup>H<sub>3</sub>-Met]  $\alpha_{1A}$ -AR-A4 (L312F) in the apo state

254 (red) and bound to ligands: prazosin (black, inverse agonist), WB-4101 (orange, inverse agonist),

255 phentolamine (purple, inverse agonist), silodosin (blue, neutral antagonist), oxymetazoline (cyan,

256 partial agonist), phenylephrine (magenta, full agonist), A-61603 (maroon, full agonist), adrenaline

257 (green, full agonist). (b) Close-up of the Met115<sup>3.41</sup> resonance in  $\alpha_{1A}$ -AR-A4 (L312F). (c) Close-up of

258 the Met203<sup>5.57</sup> resonance in  $\alpha_{1A}$ -AR-A4 (L312F). The spectra for adrenaline, A-61603 and

259 phenylephrine are plotted at a level 1.8-times lower than the main figure. (d) Normalized peak

260 intensities of Met115<sup>3.41</sup> and Met203<sup>5.57</sup> of  $\alpha_{1A}$ -AR-A4 (L312F) show differences between agonists,

261 antagonists and partial agonists. Ligands are coloured as listed above. Spectra were acquired on ~50

262  $\mu$ M  $\alpha_{1A}$ -AR-A4 (L312F) dissolved in 0.02-0.1% DDM micelle, pH 7.5 and 25 °C.

263

264 The recovered agonist affinity for  $\alpha_{1A}$ -AR-A4 (L312F) allowed the measurement of  
265  $^1\text{H}$ - $^{13}\text{C}$  SOFAST-HMQC spectra where we were confident of full receptor-agonist saturation.  
266 Binding of the full agonist adrenaline to  $\alpha_{1A}$ -AR-A4 (L312F) produced a similar Met292<sup>6,55</sup>  
267 chemical shift to that seen with  $\alpha_{1A}$ -AR-A4 (Figure 3a), and also weak peaks were now  
268 observed for Met115<sup>3,41</sup> and Met203<sup>5,57</sup> (Figure 3b,c), which were completely broadened in  
269 adrenaline-bound  $\alpha_{1A}$ -AR-A4. Importantly, the binding of all agonists, adrenaline,  
270 phenylephrine and A-61603 to  $\alpha_{1A}$ -AR-A4 (L312F) induced distinct chemical shift and line  
271 broadening changes to Met115<sup>3,41</sup> and Met203<sup>5,57</sup> compared to neutral antagonists and inverse  
272 agonists (Figure 3b,c). The agonist-induced Met115<sup>3,41</sup> resonances cluster together potentially  
273 indicative of an active transmission switch conformation (Figure 3b). Binding of the partial  
274 agonist oxymetazoline induced a chemical shift of Met115<sup>3,41</sup> falling between the inverse  
275 agonist and full agonist clusters, consistent with partial agonists promoting a weaker shift in  
276 the inactive-active transmission switch state equilibrium. The linear change in Met203<sup>5,57</sup>  
277 chemical shift position upon inverse agonist binding seen with  $\alpha_{1A}$ -AR-A4 was retained in  
278  $\alpha_{1A}$ -AR-A4 (L312F), but as hypothesised, agonist binding promoted opposite, downfield  
279 resonance shifts in the  $^{13}\text{C}$  dimension along the same vector (Figure 3c). This change in  
280  $^{13}\text{C}^\epsilon\text{H}_3$ -methionine chemical shift in the  $^{13}\text{C}$  dimension reflects a change in the  $\chi_3$  dihedral  
281 angle. The  $^{13}\text{C}$  chemical shift dependence of this angle is about 19 ppm for trans and 16 ppm  
282 for  $\pm$ gauche (Butterfoss et al., 2010). For the apo and antagonist states the chemical shift of  
283 18.25 to 18.5 ppm suggests a trend toward trans, whereas in the full-inverse agonist state the  
284 resonance shifts up-field to 17.7 ppm, indicative of an averaging between gauche and trans.  
285 Consistent with our homology models (Supplementary Figure 4) for full agonist a further  
286 downfield shift between 19 to 19.25 ppm infers an increase in the trans conformer.  
287 Interestingly, the partial agonist oxymetazoline induced a small upfield  $^{13}\text{C}^\epsilon$  shift of  
288 Met203<sup>5,57</sup>, similar to the inverse agonist phentolamine. The fact that full agonists induced

289 Met203<sup>5.57</sup> chemical shifts to move in the opposite direction to inverse agonists suggests an  
290 equilibrium shift away from inactive to active conformational states of the DRY motif.  
291 Furthermore, the resonance intensities of both Met115<sup>3.41</sup> and Met203<sup>5.57</sup> in  $\alpha_{1A}$ -AR-A4  
292 (L312F), relative to the ligand-insensitive Met145<sup>4.44</sup> resonance, were weakened upon agonist  
293 binding compared to the intensity increases seen with antagonists and inverse agonists  
294 (Figure 3d). The intensities of Met115<sup>3.41</sup> and Met203<sup>5.57</sup> upon binding of the partial agonist  
295 oxymetazoline fell in between the antagonist- and agonist-induced intensities. The behaviour  
296 of the  $^{13}\text{C}^{\epsilon}\text{H}_3$  of Met115<sup>3.41</sup> and Met203<sup>5.57</sup> is consistent with the current concept that agonists  
297 increase conformational heterogeneity in GPCRs, where agonists increase microsecond  
298 timescale transitions to active receptor states, to increase the probability of engaging and  
299 activating effector proteins (Kofuku et al., 2012; Manglik et al., 2015; Nygaard et al., 2013;  
300 Shimada et al., 2018; Solt et al., 2017; Ye et al., 2016).

301

### 302 **Chemical shift changes of Met203<sup>5.57</sup> correlate with ligand efficacy.**

303 In mammalian cells,  $\alpha_{1A}$ -AR exhibits basal activity in the absence of bound ligands (Zhu et  
304 al., 2000). Such basal activity is unaffected by the binding of neutral antagonists but is  
305 reduced by the binding of inverse agonists to the receptor. In the case of  $\alpha_{1A}$ -AR, by probing  
306 the ability of various antagonists to reduce the signalling of a constitutively active receptor  
307 mutant, the rank order of inverse agonist efficacies has been found to be: prazosin (strongest);  
308 WB-4101; phentolamine (weakest); and silodosin being a neutral antagonist (Zhu et al.,  
309 2000). To understand how the NMR signals of Met203<sup>5.57</sup> in  $\alpha_{1A}$ -AR-A4 (L312F) relate to  
310 receptor conformational equilibria, the changes to the chemical shifts for the  $^{13}\text{C}^{\epsilon}\text{H}_3$  of  
311 Met203<sup>5.57</sup> were plotted against the previously published relative efficacy values for the  
312 inverse agonists, revealing a strong linear correlation ( $R^2 = 0.99$ , Figure 4a). To test if this  
313 correlation is retained when probing inverse agonism at the wild-type  $\alpha_{1A}$ -AR, we determined

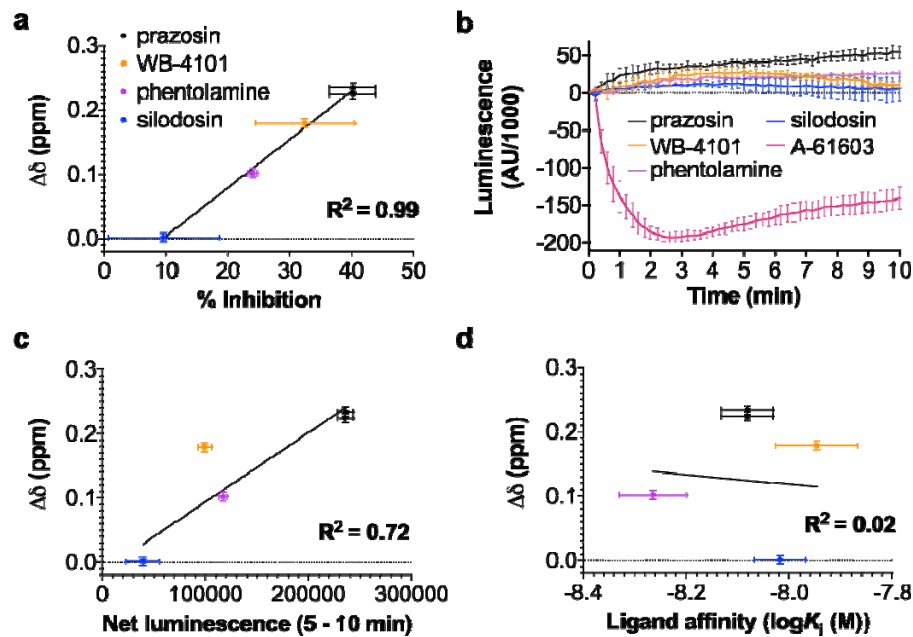

314

315 **Figure 4. Correlation between the chemical shift positions of the  $^{13}\text{C}^{\alpha}\text{H}_3$  in Met203<sup>5,57</sup> and**

316 **inverse agonists efficacy.** (a) Linear regression analysis of the average chemical shift differences

317 ( $\Delta\delta$ ) for the  $^{13}\text{C}^{\alpha}\text{H}_3$  of Met203<sup>5,57</sup> in  $\alpha_{1A}$ -AR-A4 (L312F) when bound to prazosin (black circles), WB-

318 4101 (orange circles), and phentolamine (purple circles) compared to silodosin (blue circles) and the

319 published efficacy of each ligand in reducing the signaling of a constitutively active mutant of  $\alpha_{1A}$ -AR

320 (Zhu et al., 2000). Published data were extracted using WebPlotDigitizer

321 (<https://automeris.io/WebPlotDigitizer>). Testing the resultant equation against the null hypothesis of a

322 slope of zero resulted in a P value of  $< 0.0001$  (b) NanoBit G protein activity assay demonstrating

323 inverse agonism of prazosin, WB-4101, phentolamine and silodosin at WT  $\alpha_{1A}$ -AR-expressing COS-7

324 cells. Each of these inverse agonist experiments were repeated in three independent biological

325 replicate experiments, with the mean  $\pm$  SEM of the resultant luminescence plotted for each timepoint.

326 To demonstrate the response from an agonist, A-61603 treatment was performed in two independent

327 biological replicate experiments. Each biological replicate comprised three technical replicates

328 measured in parallel. The grey shaded region indicates where the area under each biological replicate

329 curve was calculated for (c). (c) Linear regression analysis of the average chemical shift differences

330 ( $\Delta\delta$ ) for the  $^{13}\text{C}^{\alpha}\text{H}_3$  of Met203<sup>5,57</sup> in  $\alpha_{1A}$ -AR-A4 (L312F) and the increase in luminescence seen in the

331 NanoBit assay for each inverse agonist and neutral antagonist. Ligands are coloured as listed above



332 and the P value testing against a slope of 0 was 0.011 (d) Linear regression analysis of the average  
333 chemical shift differences ( $\Delta\delta$ ) for the  $^{13}\text{C}^6\text{H}_3$  of Met203<sup>5,57</sup> in  $\alpha_{1A}$ -AR-A4 (L312F) and the affinities  
334 of each inverse agonist and neutral antagonist. Ligands are coloured as listed above and the P value  
335 testing against a slope of 0 was 0.89. In (a), (c) and (d)  $\Delta\delta$  are plotted for two independent titrations of  
336 prazosin and silodosin, and single experiments for WB-4101 and phentolamine. Average chemical  
337 shift differences ( $\Delta\delta$ ) were normalised using the equation  $\Delta\delta=[(\Delta\delta_{1H})^2+(\Delta\delta_{13C}/3.5)^2]^{0.5}$  and error were  
338 calculated by the formula  $[\Delta\delta_{1H}^2 * R_{1H} + \Delta\delta_{13C}^2 * R_{13C} / (3.5)^2] / \Delta\delta$ , where  $R_{1H}$  and  $R_{13C}$  are the digital  
339 resolutions in ppm in the  $^1\text{H}$  and  $^{13}\text{C}$  dimensions respectively (Kofuku et al., 2012).

340

341 the relative inverse agonist efficacies of these ligands using a NanoBiT split luciferase assay  
342 (Inoue et al., 2019). In this assay the 18 kDa Large BiT (LgBiT) fragment was fused to the N-  
343 terminus of  $G\alpha_q$  and the 1.3 kDa Small BiT (SmBiT) was fused to the N-terminus of  $G\gamma_2$ .  
344 When co-expressed with  $G\beta_1$ , the formation of a  $G\alpha_q(\text{LgBiT})\text{-}G\beta_1\text{-}G\gamma_2(\text{SmBiT})$  heterotrimer  
345 results in bright luminescence. GPCR-induced stimulation of this G protein complex causes  
346 dissociation of the heterotrimer and thus reduction in luminescence output, whereas inhibition  
347 of basal GPCR activation would be predicted to increase luminescence output. COS-7  
348 African green monkey kidney cells stably expressing wild-type (WT)  $\alpha_{1A}$ -AR were  
349 transfected with  $G\alpha_q(\text{LgBiT})$ ,  $G\beta_1$  and  $G\gamma_2(\text{SmBiT})$  encoding expression plasmids, incubated  
350 with luminescence substrate, and then treated with various  $\alpha_{1A}$ -AR ligands while monitoring  
351 cellular luminescence. A-61603 induced  $\alpha_{1A}$ -AR activation led to heterotrimer dissociation of  
352 the  $G\alpha_q(\text{LgBiT})\text{-}G\beta_1\text{-}G\gamma_2(\text{SmBiT})$  complex and thus a reduction in luminescence output  
353 (Figure 4b). Inverse agonists on-the-other-hand reduced basal activation of  $\alpha_{1A}$ -AR,  
354 maintaining the  $G\alpha_q(\text{LgBiT})\text{-}G\beta_1\text{-}G\gamma_2(\text{SmBiT})$  complex leading to increase luminescence  
355 output from the cells (Figure 4b). The specificity of these responses was probed by  
356 conducting the same experiments on COS-7 cells not expressing  $\alpha_{1A}$ -AR (Supplementary  
357 Figure 7a-c). The observed changes in luminescence after  $\alpha_1$ -AR ligand treatments were



358 specific to  $\alpha_{1A}$ -AR expressing cells except for WB-4101, which induced a short (5 min)  
359 increase in luminescence in the control cells (Supplementary Figure 7a). To exclude this non-  
360 specific effect the net luminescence change for each sample group was calculated as the area  
361 under the luminescence curves between 5 and 10 min after ligand addition. A strong linear  
362 correlation was found between the chemical shift changes for the  $^{13}\text{C}^\epsilon\text{H}_3$  of Met203<sup>5,57</sup> in  $\alpha_{1A}$ -  
363 AR-A4 (L312F) and the net luminescence increase generated by each inverse agonist over  
364 the five-minute period in the WT  $\alpha_{1A}$ -AR-expressing cells ( $R^2 = 0.72$ , Figure 4c).  
365 Importantly, the Met203<sup>5,57</sup> chemical shift positions of  $\alpha_{1A}$ -AR-A4 (L312F) did not correlate  
366 with the affinity of these antagonists for  $\alpha_{1A}$ -AR (Figure 4d), demonstrating that the  
367 differences in chemical shift were not due to varying receptor occupancy. Furthermore, no  
368 correlation was seen between the  $^{13}\text{C}^\epsilon\text{H}_3$  Met203<sup>5,57</sup> chemical shift changes of  $\alpha_{1A}$ -AR-A4  
369 (L312F) and the net luminescence changes in COS-7 cells not expressing WT  $\alpha_{1A}$ -AR  
370 (Supplementary Figure 7b). Critically, the correlation between chemical shift changes of  
371  $^{13}\text{C}^\epsilon\text{H}_3$  Met203<sup>5,57</sup> in  $\alpha_{1A}$ -AR-A4 (L312F) and WT  $\alpha_{1A}$ -AR-specific luminescence increases in  
372 the NanoBiT assay remained when the analysis window was extended to include the full 10  
373 minutes after ligand addition (Supplementary Figure 7d).

374

### 375 **Improving signalling competency in $\alpha_{1A}$ -AR-A4**

376 When expressed in COS-7 cells,  $\alpha_{1A}$ -AR-A4 is incapable of stimulating cellular increases in  
377 IP<sub>1</sub> in response to adrenaline binding, or activation of a cyclic adenosine monophosphate  
378 (cAMP) response element (CRE) reporter gene after treatment with another  $\alpha_1$ -AR agonist,  
379 phenylephrine (Yong et al., 2018). To ensure biological relevance of our NMR studies we  
380 thus sought  $\alpha_{1A}$ -AR-A4 back-mutants that were able to stimulate canonical signalling  
381 pathways in mammalian cells upon agonist treatment. Seven thermostabilising mutations  
382 within the TMD of  $\alpha_{1A}$ -AR-A4 were back-mutated (Y67N, M80L, A127G, F151W, K322N,

383 L327P and Y329S) as single changes or in combinations, and screened for phenylephrine and  
384 oxymetazoline induced signalling with an IP<sub>1</sub> assay in transfected COS-7 cells  
385 (Supplementary Figure 8a). While the back-mutant,  $\alpha_{1A}$ -AR-A4 (Y67N, M80L, K322N,  
386 L327P, Y329S) was able to facilitate significant oxymetazoline-induced cellular  
387 accumulation of IP<sub>1</sub> compared to  $\alpha_{1A}$ -AR-A4 and WT  $\alpha_{1A}$ -AR (Supplementary Figure 8a) it  
388 expressed poorly in bacteria. The back-mutant  $\alpha_{1A}$ -AR-A4 (Y67N, K322N), termed  $\alpha_{1A}$ -AR-  
389 A4-active, however was able to stimulate IP<sub>1</sub> accumulation in response to both phenylephrine  
390 and oxymetazoline treatment (Supplementary Figure 8a) and it expressed well in bacteria.  
391 Importantly,  $\alpha_{1A}$ -AR-A4 contains the N322K-stabilising mutation in the NPxxY  
392 switch (Trzaskowski et al., 2012), which is hypothesised to form a stabilizing salt bridge with  
393 Asp72<sup>2.50</sup> to lock the NPxxY switch in an inactive and stable state. We thus expected that  
394 reversion of this mutation (K322N) would restore the function of the NPxxY switch and the  
395 signalling activity of  $\alpha_{1A}$ -AR-A4. Interestingly, the Y67N mutation was required on top of  
396 K322N to restore signalling activity in  $\alpha_{1A}$ -AR-A4-active. N67<sup>2.45</sup> is distant from the NPxxY  
397 switch and its importance is not clear.

398         Using an intracellular calcium mobilisation assay,  $\alpha_{1A}$ -AR-A4-active was able to be  
399 activated by the full agonists adrenaline and A-61603, as well as the partial agonists  
400 oxymetazoline and PF-3774076 (Supplementary Figure 8b-e). The affinity of QAPB for  $\alpha_{1A}$ -  
401 AR-A4-active was retained upon purification of the receptor in DDM (Supplementary Figure  
402 9a). Competition binding assays revealed however, that the affinities of agonists for  $\alpha_{1A}$ -AR-  
403 A4-active (Supplementary Figure 9b and Supplementary Table 1) were weaker than WT  $\alpha_{1A}$ -  
404 AR due to the F312L stabilizing mutation, but stronger than at  $\alpha_{1A}$ -AR-A4 (Yong et al.,  
405 2018). When purified in DDM  $\alpha_{1A}$ -AR-A4-active was significantly less stable than  $\alpha_{1A}$ -AR-  
406 A4 (Supplementary Figure 9c) and thus back-mutation of F312L to recover agonist potency  
407 was not pursued as it was deemed unlikely that the resultant receptor would be stable enough

408 for NMR experiments.

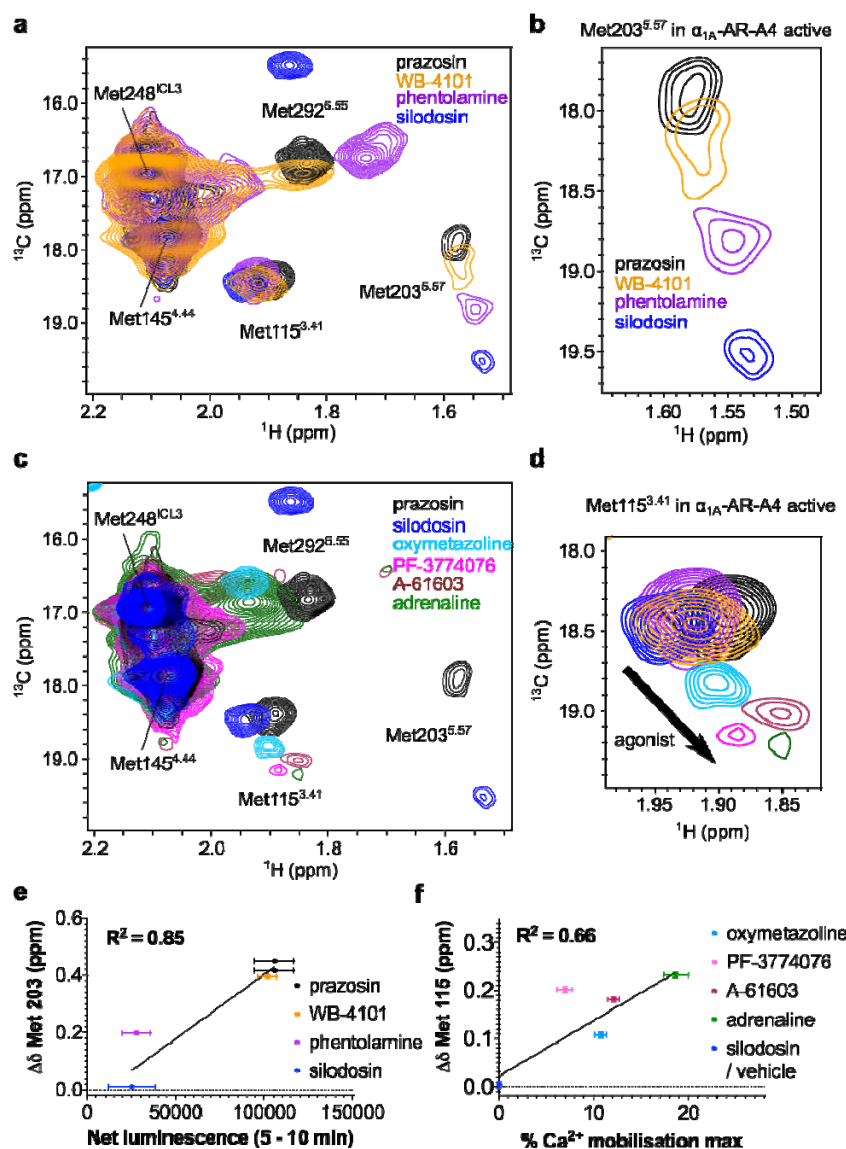

409

410

411 **Figure 5.  $^1\text{H}$ - $^{13}\text{C}$  SOFAST-HMQC spectra of  $\alpha_{1A}$ -AR-A4-active.** (a) Overlay of 2D  $^1\text{H}$ - $^{13}\text{C}$   
 412 SOFAST-HMQC spectra of [ $^{13}\text{C}_6\text{H}_3$ -Met]  $\alpha_{1A}$ -AR-A4-active bound to prazosin (black, inverse  
 413 agonist), WB-4101 (yellow, inverse agonist), phentolamine (purple, inverse agonist) and silodosin  
 414 (blue, neutral antagonist). (b) Close-up of the Met203<sup>5.57</sup> resonance. (c) Overlay of 2D  $^1\text{H}$ - $^{13}\text{C}$   
 415 SOFAST-HMQC spectra of [ $^{13}\text{C}_6\text{H}_3$ -Met]  $\alpha_{1A}$ -AR-A4-active bound to prazosin (black, inverse  
 416 agonist), silodosin (blue, neutral antagonist), oxymetazoline (cyan, partial agonist), PF-3774076  
 417 (magenta, partial agonist), A-61603 (maroon, full agonist), and adrenaline (green, full agonist). (d)

418 Close-up of the Met115<sup>3,41</sup> resonance. (e) Linear regression analysis of the average chemical shift  
419 differences ( $\Delta\delta$ ) for the  $^{13}\text{C}^\epsilon\text{H}_3$  of Met203<sup>5,57</sup> in  $\alpha_{1A}$ -AR-A4-active when bound to prazosin (black  
420 circles), WB-4101 (orange circles), and phentolamine (purple circles) compared to silodosin (blue  
421 circles) and the increase in luminescence seen in the NanoBit assay with  $\alpha_{1A}$ -AR-A4-active  
422 expressing COS-7 cells treated with the same antagonist (from Supplementary Figure 11a). Testing  
423 the resultant equation against the null hypothesis of a slope of zero resulted in a P value of 0.0041 (f)  
424 Linear regression analysis of the average chemical shift differences ( $\Delta\delta$ ) for the  $^{13}\text{C}^\epsilon\text{H}_3$  of Met115<sup>3,41</sup>  
425 in  $\alpha_{1A}$ -AR-A4-active when bound to oxymetazoline (cyan circles), PF-3774076 (pink circles), A-  
426 61603 (dark red circles), adrenaline (green circles) and silodosin (blue circles) and the efficacy of  
427 each agonist in triggering  $\text{Ca}^{2+}$  mobilization in  $\alpha_{1A}$ -AR-A4-active expressing COS-7 cells (from  
428 Supplementary Figure 8b-e). Testing the resultant equation against the null hypothesis of a slope of  
429 zero resulted in a P value of 0.0154 In (e) and (f)  $\Delta\delta$  are plotted for two independent titrations of  
430 prazosin, silodosin and oxymetazoline, and single experiments for other ligands. In (a-d) spectra were  
431 acquired on  $\sim 50 \mu\text{M}$   $\alpha_{1A}$ -AR-A4-active dissolved in 0.02-0.1% DDM micelle, pH 7.5 and 25 °C.  
432 Average chemical shift differences ( $\Delta\delta$ ) were normalised using the equation  
433  $\Delta\delta = [(\Delta\delta_{1\text{H}})^2 + (\Delta\delta_{13\text{C}}/3.5)^2]^{0.5}$  and errors were calculated by the formula  
434  $[\Delta\delta_{1\text{H}} * R_{1\text{H}} + \Delta\delta_{13\text{C}} * R_{13\text{C}} / (3.5)^2] / \Delta\delta$ , where  $R_{1\text{H}}$  and  $R_{13\text{C}}$  are the digital resolutions in ppm in the  $^1\text{H}$  and  
435  $^{13}\text{C}$  dimensions respectively (Kofuku et al., 2012).

436

437  $\alpha_{1A}$ -AR-A4-active was labelled with  $^{13}\text{C}^\epsilon\text{H}_3$ -methionine and 2D  $^1\text{H}$ - $^{13}\text{C}$  SOFAST-  
438 HMQC spectra acquired as above (Figure 5a,c). Overall the ligand-perturbed chemical shifts  
439 of the  $^{13}\text{C}^\epsilon\text{H}_3$ -methionine resonances in  $\alpha_{1A}$ -AR-A4-active were similar to those in  $\alpha_{1A}$ -AR-  
440 A4 and  $\alpha_{1A}$ -AR-A4 (L312F), except for several key differences with the Met115<sup>3,41</sup> and  
441 Met203<sup>5,57</sup> resonances. We acquired spectra of four independent preparations of apo  $\alpha_{1A}$ -AR-  
442 A4-active (four biological replicates) and found that in the absence of bound ligand the data  
443 were not easily reproduced (Supplementary Figure 10a). The well resolved Met203<sup>5,57</sup> varied

444 between an intense peak, two peaks of similar intensity, or a peak of weak intensity.  
445 Met115<sup>3,41</sup> persisted as a split peak, although the two components varied in intensity.  
446 Importantly, in the presence of the most potent inverse agonist, prazosin, the resonances of  
447 Met115<sup>3,41</sup> and Met203<sup>5,57</sup> were single peaks, and regardless of sample preparation, exhibited  
448 the same chemical shifts. The <sup>13</sup>C<sup>ε</sup>H<sub>3</sub> Met115<sup>3,41</sup> resonance, as perturbed by prazosin, aligned  
449 approximately with the upfield component of the resonance for apo α<sub>1A</sub>-AR-A4-active  
450 (Supplementary Figure 10b). In contrast, upon titration with the neutral antagonist, silodosin,  
451 the peaks of Met115<sup>3,41</sup> also collapsed to a single resonance with identical chemical shifts,  
452 but now aligned best with the downfield component of apo α<sub>1A</sub>-AR-A4-active  
453 (Supplementary Figure 10b). For the two partial inverse agonists, WB-4101 and  
454 phentolamine, the <sup>13</sup>C<sup>ε</sup>H<sub>3</sub> resonance of Met115<sup>3,41</sup> was a single resonance, positioned midway  
455 between the ‘prazosin’ (upfield) and ‘silodosin’ (downfield) peaks (Figure 5d). These trends  
456 for ligand-efficacy were present in α<sub>1A</sub>-AR-A4 and α<sub>1A</sub>-AR-A4 (L312F), but were not as  
457 distinct as now observed for α<sub>1A</sub>-AR-A4-active, and notably the apo states for α<sub>1A</sub>-AR-A4  
458 and α<sub>1A</sub>-AR-A4 (L312F) did not show two discrete peaks for Met115<sup>3,41</sup>. Such apo state  
459 sample-to-sample heterogeneity may suggest the presence of misfolded contaminants, but  
460 upon the addition of prazosin or silodosin each of these samples gave identical spectra  
461 (Supplementary Figure 10a), supporting the binding competency of the α<sub>1A</sub>-AR-A4-active  
462 samples. The diversity of apo state spectra likely reflects diversity of conformational states of  
463 similar free energy. The addition of agonist again resulted in , a single resonance for <sup>13</sup>C<sup>ε</sup>H<sub>3</sub>  
464 Met115<sup>3,41</sup> that shifts upfield in <sup>1</sup>H and downfield in <sup>13</sup>C (Figure 5d). The trend in shifts of  
465 these resonances, however, suggests they follow in a linear manner evolving from the  
466 downfield (basal) signal of the apo state and reflects the selection of the active-like state.

467 A major difference between the spectra of α<sub>1A</sub>-AR-A4 and α<sub>1A</sub>-AR-A4-active,  
468 however, was significantly increased line broadening of the Met203<sup>5,57</sup> signal of α<sub>1A</sub>-AR-A4-

469 active in the apo state (Supplementary Figure 10a) and when bound to antagonists (Figure 5b).  
470 This broadening suggests that the DRY motif near the G protein-binding site of  $\alpha_{1A}$ -AR-A4-  
471 active is more dynamic compared to  $\alpha_{1A}$ -AR-A4, consistent with a receptor that more readily  
472 transitions between inactive and active-receptor states. Importantly, similar to  $\alpha_{1A}$ -AR-A4  
473 and  $\alpha_{1A}$ -AR-A4 (L312F) variants, the  $^{13}\text{C}^{\epsilon}\text{H}_3$  of Met203<sup>5,57</sup> shows an efficacy-dependent  
474 linear  $^{13}\text{C}^{\epsilon}\text{H}_3$  chemical shift change in the presence of inverse agonist and neutral antagonist,  
475 trending to an upfield  $^{13}\text{C}$  position ( $\chi_3$  of  $\pm$ gauche) for the more potent inverse agonist  
476 (Figure 5a,b). Unexpectedly, the addition of silodosin (neutral antagonist) resulted in a  
477 significant  $^{13}\text{C}$  downfield shift to near 19.5 ppm consistent with a trans  $\chi_3$  angle for  
478 Met203<sup>5,57</sup>. Furthermore, similar to  $\alpha_{1A}$ -AR-A4, the Met203<sup>5,57</sup>  $^{13}\text{C}^{\epsilon}\text{H}_3$  resonance of  $\alpha_{1A}$ -AR-  
479 A4-active was near completely broadened in the presence of agonists.

480 NanoBiT G protein activity assays were performed on COS-7 cells expressing  $\alpha_{1A}$ -  
481 AR-A4-active to determine relative inverse agonist efficacies. The inverse agonists reduced  
482 basal Gq activity in  $\alpha_{1A}$ -AR-A4-active in a similar way to WT  $\alpha_{1A}$ -AR expressing cells  
483 (Figure 4a and Supplementary Figure 11a). The net luminescence change induced by each  
484 inverse agonist at  $\alpha_{1A}$ -AR-A4-active expressing cells correlated well, in a linear fashion, with  
485 the  $^{13}\text{C}^{\epsilon}\text{H}_3$  chemical shift changes of Met203<sup>5,57</sup> that each ligand induced at purified  $\alpha_{1A}$ -AR-  
486 A4-active, when analysed over two separate time periods (Figure 5e and Supplementary  
487 Figure 11b). Interestingly, the agonist-induced chemical shift changes of  $^{13}\text{C}^{\epsilon}\text{H}_3$  Met115<sup>3,41</sup>  
488 showed a linear correlation with the efficacy of each agonist in  $\text{Ca}^{2+}$  mobilization assays on  
489  $\alpha_{1A}$ -AR-A4-active expressing COS-7 cells (Figure 5f) although the partial agonist PF-  
490 3774076 was a notable outlier. Overall these cell-based assays with the ligand efficacy-  
491 correlated chemical shift changes of Met115<sup>3,41</sup> and Met203<sup>5,57</sup> clearly demonstrate that a  
492 conformational selection mechanism underlies receptor function in cells.

493



## 495 Discussion

496 Recent spectroscopic studies have demonstrated that different classes of GPCR ligands  
497 distinctly alter the population of receptor states within the GPCR conformational  
498 equilibrium(Shimada et al., 2018). GPCR conformational changes are driven by defined  
499 structural changes in the microswitches (Ahuja and Smith, 2009; Deupi and Standfuss, 2011;  
500 Latorraca et al., 2017; Trzaskowski et al., 2012) (Figure 1) and, thus, how particular ligands  
501 affect the GPCR microswitch states likely underlies their pharmacological output as inverse,  
502 partial, full or biased agonists. Observing these effects, however, remains challenging.  $\alpha_{1A}$ -  
503 AR was one of the first GPCRs to be cloned and pharmacologically characterised (Cotecchia  
504 et al., 1988) and is clinically targeted with agonists as nasal decongestants and antagonists for  
505 hypertension and BPH. Despite the importance of this receptor there are currently no three-  
506 dimensional structures of  $\alpha_{1A}$ -AR, reflecting the inherent instability of this protein. Here, we  
507 demonstrate that prototypical ligands modulate the conformational equilibrium, as measured  
508 at the microswitches, of  $\alpha_{1A}$ -AR in defined and predictable ways by  $^{13}\text{C}^\epsilon\text{H}_3$ -methionine  
509 labelling  $\alpha_{1A}$ -AR variants and monitoring the  $^1\text{H}$  and  $^{13}\text{C}$  chemical shifts of these methyl  
510 resonances in the presence of ligands of different efficacy,.

511 It is well accepted that the NMR signals of methionine methyl groups are sensitive to  
512 the local environment and the conformation of the methionine side chain (Kofuku et al., 2012;  
513 Nygaard et al., 2013). Many of the conclusions made in this study rely on Met115<sup>3,41</sup>, a probe  
514 for the conformation of the transmission switch, and Met203<sup>5,57</sup> as a probe of the DRY motif  
515 that signifies intracellular TMD rearrangements for G-protein binding. In our model of  $\alpha_{1A}$ -  
516 AR, Met203<sup>5,57</sup> sits over Tyr125<sup>3,51</sup> of the DRY motif but is distant from Arg124<sup>3,50</sup> which is  
517 expected to undergo significant rotameric changes within this motif (Carpenter and Tate,  
518 2017) (Figure 1d). Met115<sup>3,41</sup> is sequential to the Ile114<sup>3,40</sup> in TM3 but it points away and is  
519 distant to transmission switch residue Phe281<sup>6,44</sup> located on TM6 that is expected to undergo



520 significant rotameric changes (Figure 1c). While in the thermostabilized inactive  $\alpha_{1A}$ -AR-A4  
521 mutant the residues of the transmission switch and DRY motif are retained, the asparagine of  
522 a third microswitch, the NPxxY motif, is mutated to lysine, which likely forms a salt bridge  
523 with Asp72<sup>2.50</sup> to lock this switch in an inactive state. The transmission switch and NPxxY  
524 motif are proximal to each other and therefore Met115<sup>3.41</sup>, while distant to NPxxY, is likely  
525 to be sensitive to conformational changes involving both switches. In the reported active-state  
526 GPCR structures, three conserved residues (Arg<sup>3.50</sup> of the DRY motif, Tyr<sup>7.53</sup> of the NPxxY  
527 motif and Tyr<sup>5.58</sup>) adopt near identical positions and connect these microswitches through  
528 water-mediated hydrogen bonds (Carpenter and Tate, 2017; Manglik and Kruse, 2017).  
529 Furthermore, in our model of active  $\alpha_{1A}$ -AR which is based on structures of  $\beta_2$ -AR,  
530 Arg124<sup>3.50</sup> of the DRY motif is in contact with Tyr326<sup>7.53</sup> of the NPxxY motif (Figure 1d).

531 In our NMR experiments for all ligands the  $^{13}\text{C}^\epsilon\text{H}_3$  group of both Met115<sup>3.41</sup> and  
532 Met203<sup>5.57</sup> show significant directional chemical shift and line-width changes that are  
533 correlated with ligand efficacy, not affinity. As a distinct peak is observed for the addition of  
534 each ligand the chemical shift likely reflects an average population exchanging on a fast to  
535 intermediate timescale. The chemical shift differences, however, reflect a shift in the  
536 equilibrium, and specifically for the  $^{13}\text{C}^\epsilon\text{H}_3$  of Met203<sup>5.57</sup>, from a  $\chi^3$  of a gauche-trans  
537 average (inverse agonist) towards a trans (agonist) average (Figure 6a). An NMR study using  
538  $^{15}\text{N}$ -labelled, thermostabilised  $\beta_1$ AR observed substantial ligand efficacy-correlated backbone  
539 chemical shift changes for V226<sup>5.57</sup>, which is in the same position as Met203<sup>5.57</sup> in  $\alpha_{1A}$ -AR  
540 (Isogai et al., 2016). The authors speculated that these changes were caused by TM5 bending  
541 towards the active receptor state (Isogai et al., 2016), an idea that may also apply to  $\alpha_{1A}$ -AR  
542 and other GPCRs. Here, the linear chemical shift changes of Met203<sup>5.57</sup>, and to a lesser  
543 degree Met115<sup>3.41</sup>, in response to ligands of different efficacy is strong evidence that agonists  
544 activate  $\alpha_{1A}$ -AR via a conformational selection mechanism. The line broadening of

545 Met115<sup>3,41</sup> and Met203<sup>5,57</sup> upon agonist binding supports an efficacy-driven shift in dynamics,  
 546 and thereby the equilibrium of conformational states, communicated allosterically by the  
 547 microswitches and sensed by these methionine residues (Figure 6).

548

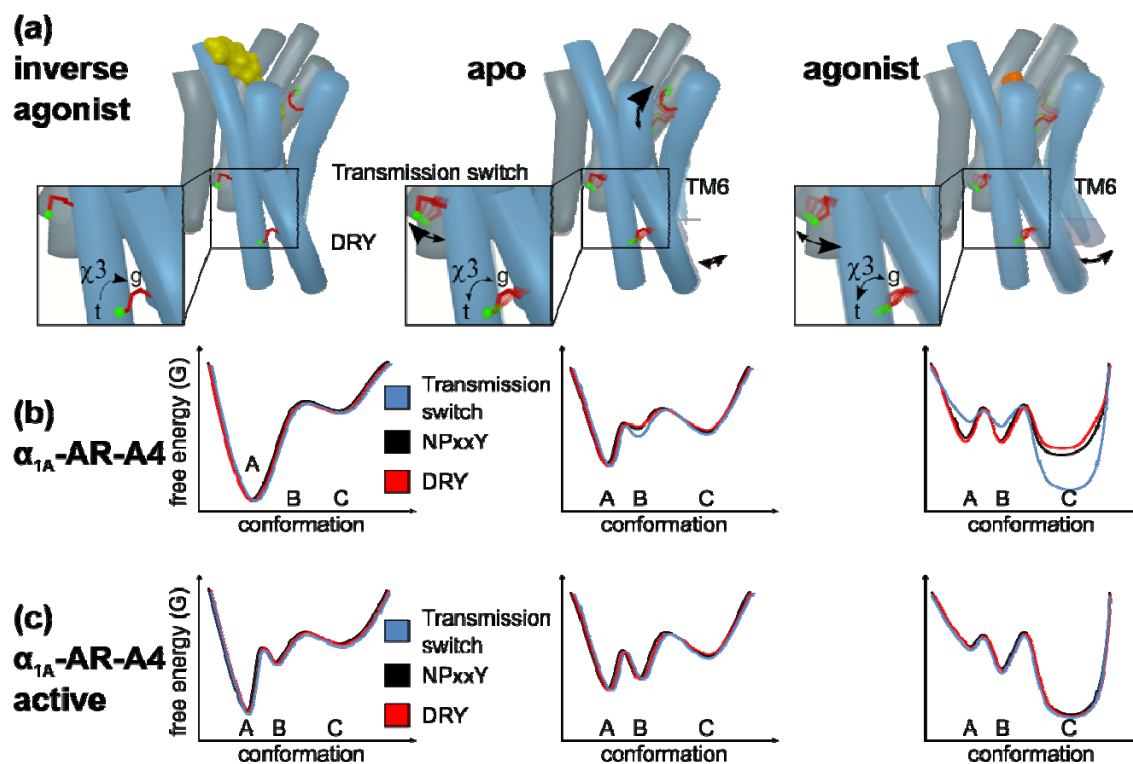

549

550 **Figure 6. How ligands modulate the conformational landscape of the  $\alpha_{1A}$ -AR microswitches.** (a)  
 551 Cartoon representations of  $\alpha_{1A}$ -AR in the inverse agonist-bound, apo, and agonist-bound states. The  
 552 three probe methionines, Met292<sup>6,55</sup> (binding site), Met115<sup>3,41</sup> (transmission switch) and Met203<sup>5,57</sup>  
 553 (DRY microswitch) are highlighted with red sticks and the labeled methyl group in green. The arrows  
 554 labeled  $\chi^3$  illustrate the ligand induced changes to the equilibrium between the trans (t) and gauche (g)  
 555  $\chi^3$  dihedral angle of Met203<sup>5,57</sup>. Other arrows indicate how different ligands alter the conformation  
 556 equilibria of Met292<sup>6,55</sup>, Met115<sup>3,41</sup> and TM6. Hypothetical free energy landscape diagrams of the  
 557 three microswitches in (b) the inactive  $\alpha_{1A}$ -AR-A4 receptor compared to (c)  $\alpha_{1A}$ -AR-A4-active. (A)  
 558 indicates the proposed inactive states, (B) represents basal states, and (C) represents active states of  
 559 the microswitches.

560 For our signalling incompetent receptors,  $\alpha_{1A}$ -AR-A4 and  $\alpha_{1A}$ -AR-A4 (L312F), the  
561 NPxxY microswitch has been mutated (N322K) in a way that would bias the NPxxY switch  
562 towards inactive states (K322 - D72 salt bridge). A consequence of this mutation is that for  
563  $\alpha_{1A}$ -AR-A4 (L312F) the DRY motif probe, Met203<sup>5,57</sup>, gives relatively intense chemical  
564 shifts in the apo and antagonist-t-bound states (conformational equilibrium biased towards  
565 inactive states) (Figure 6b). On restoration of the NPxxY microswitch in  $\alpha_{1A}$ -AR-A4-active  
566 however, the Met203<sup>5,57</sup> chemical shifts broaden and shift towards the agonist bound position  
567 (as defined for  $\alpha_{1A}$ -AR-A4 (L312F)), even with neutral antagonist bound. Therefore,  
568 restoring the NPxxY microswitch enables the DRY motif of  $\alpha_{1A}$ -AR-A4-active to more  
569 readily sample active-like states. The full trans (19.5 ppm in <sup>13</sup>C) populated by silodosin  
570 indicates that we may observe the full-active state, although previous studies showed that the  
571 full-active state is only populated in the presence of both agonist and nanobody (Manglik et  
572 al., 2015; Nygaard et al., 2013; Solt et al., 2017; Sounier et al., 2015; Xu et al., 2019). Our  
573 two methionine probes, Met115<sup>3,41</sup> and Met203<sup>5,57</sup>, retain similar ligand-induced behaviour in  
574  $\alpha_{1A}$ -AR-A4-active compared to  $\alpha_{1A}$ -AR-A4 and  $\alpha_{1A}$ -AR-A4 (L312F), where the latter are  
575 both essentially inactive. The chemical shift and line-broadening trends of Met115<sup>3,41</sup> and  
576 Met203<sup>5,57</sup> suggest that the transmission switch and DRY motif, in the presence of an inactive  
577 NPxxY motif, can independently adopt conformations representative of active and inactive  
578 states. To fully adopt the conformational signatures of an active receptor, a functional NPxxY  
579 motif is required (in  $\alpha_{1A}$ -AR-A4-active) thus increasing the dynamics of the transmission  
580 switch and DRY motif, suggesting that the interdependence of the three microswitches is a  
581 consequence of their dynamic nature, and that this is required for full receptor function.

582 While the striking linear chemical shift dependence for the <sup>13</sup>C<sup>ε</sup>H<sub>3</sub> of Met203<sup>5,57</sup> on  
583 ligand efficacy is consistent with a smooth change in equilibria from inactive to active, linear  
584 trends for <sup>13</sup>C<sup>ε</sup>H<sub>3</sub> of Met115<sup>3,41</sup> were less clear. In the inactive variants  $\alpha_{1A}$ -AR-A4 and  $\alpha_{1A}$ -

585 AR-A4 (L312F) the resonance for apo, inverse agonist and neutral antagonist shows little  
586 variation, but clear chemical shift changes and broadening are observed for agonists. The  
587 most distinct changes for the  $^{13}\text{C}^\epsilon\text{H}_3$  of Met115<sup>3,41</sup> were for  $\alpha_{1A}$ -AR-A4-active, where in the  
588 apo-state two peaks were consistently observed, suggesting slow exchange (> millisecond)  
589 between two distinct states, to which we attribute to restoring the NPxxY microswitch. On  
590 the basis of chemical shift, we propose that the upfield peak of apo  $\alpha_{1A}$ -AR-A4-active  
591 represents fully inactive receptor (state A in Figure 6), expected for full inverse agonists, and  
592 the downfield peak with a basal state receptor that is stabilized by the neutral antagonist (state  
593 B in Figure 6). This downfield ‘basal’ peak shows approximate linear efficacy-dependent  
594 chemical shift changes with agonist titrations. Therefore, the  $^{13}\text{C}^\epsilon\text{H}_3$  of Met115<sup>3,41</sup> reflects  
595 three states, (inverse agonist) inactive, an intermediate (basal) and active states (state(s) C in  
596 Figure 6), where the latter progressively shift from partial to full agonist states. Interestingly,  
597 in a  $^{13}\text{C}^\epsilon\text{H}_3$ -methionine labelled study on the M2R, Met112<sup>3,41</sup>, which is equivalent to  
598 Met115<sup>3,41</sup> in  $\alpha_{1A}$ -AR, did not display efficacy-dependent chemical shift changes. In the  
599 presence of ligands, however, M2R Met112<sup>3,41</sup> was resolved as two separate resonances,  
600 consistent with a slow exchanging microswitch(Xu et al., 2019) and may highlight some  
601 differences between how different rhodopsin family GPCRs function.

602 In this NMR study, by starting with a signalling incompetent variant of  $\alpha_{1A}$ -AR and  
603 subsequently restoring signalling activity through back mutations, we were able to study the  
604 functional dynamics of the key GPCR microswitches and how different ligands modulate  
605 this. Our NMR data for the transmission and DRY microswitches revealed ligand efficacy-  
606 dependent changes to the microswitch conformational equilibria, supporting a conformational  
607 selection mechanism for  $\alpha_{1A}$ -AR modulation. This and the agonist-driven line broadening for  
608 both microswitches suggest similar mechanistic actions on the different microswitches,  
609 supporting ligand-driven allosteric communication between the microswitches. MD

610 simulations (Dror et al., 2011) of  $\beta_2$ -AR suggest that these microswitches behaved  
611 independently of each other, with only loose allosteric coupling. While this may be true over  
612 the relatively short timescales of MD, we believe that over the course of an NMR experiment  
613 such loose allosteric coupling culminates in significant coupled shifts to the microswitch  
614 conformations and that this is likely how ligands modulate GPCR signalling in cells.

615

#### 616 **Data Availability**

617 All data that support the conclusions are included in the published paper and its  
618 supplementary information, or are available from the authors on request.

619

#### 620 **Acknowledgements**

621 We thank Dr Fabian Bumbak (The Florey Institute of Neuroscience and Mental Health) for  
622 assistance with optimising the expression and purification of receptor samples; Prof. Dmitry  
623 Veprintsev (University of Nottingham) and Dr Franziska Heydenreich (Stanford University)  
624 for suggesting back mutations for the generation of  $\alpha_{1A}$ -AR-A4-active; Prof. Asuka Inoue  
625 (Tohoku University) for supplying plasmids for the G protein activity assays; Sharon  
626 Layfield (The Florey Institute of Neuroscience and Mental Health) and Dr Ashish Sethi (The  
627 University of Melbourne) for assistance with cell-based assays and NMR data analysis  
628 respectively; Dr David Chalmers (Monash University) and the Monash University Medicinal  
629 Chemistry Computational Chemistry Facility for the assistance with computational modelling;  
630 The Bio21 NMR facility for access to spectrometers. This work was supported by NHMRC  
631 project grants 1081801 (D.J.S), 1081844 (P.R.G, D.J.S, R.A.D.B) and 1141034 (D.J.S, P.R.G,  
632 R.A.D.B). D.J.S. is an NHMRC Boosting Dementia Research Leadership Fellow.

633

634

635

636 **Author contributions**

637 FJW performed cloning, mutagenesis, protein expression and purification, thermostability  
638 assays, acquisition and analysis of NMR data; LMW competition binding assays and  
639 saturation binding assays; AAR intracellular Ca<sup>2+</sup> mobilization assays; AG, MK, and RADB  
640 NanoBiT G protein activity assays; TV computational modelling; ARW IP<sub>1</sub> assays. DJS,  
641 MDWG and PRG conceived the experiments and with FJW analysed, prepared figures and  
642 wrote the manuscript. All authors contributed to the editing of the manuscript.

643

644 **Competing financial interests**

645 The authors declare no competing financial interests.

646

647 **Methods**

648  **$\alpha_{1A}$ -AR constructs**

649 The  $\alpha_{1A}$ -AR-A4 variant is a thermostabilised human  $\alpha_{1A}$ -AR, containing 15 stabilising  
650 mutations (Yong et al., 2018). Met80<sup>2,58</sup> in the spectra was introduced through the  
651 stabilisation process in lieu of the naturally occurring amino acid leucine. As compared to  
652 wild type, the carboxyl termini of the  $\alpha_{1A}$ -AR-A4 variant was modified by truncation at  
653 Ser351 and addition of a deca-His tag to facilitate purification (Supplementary Figure 1). For  
654 expression, the  $\alpha_{1A}$ -AR variants sequences were sub-cloned into the pQE30 derived vector,  
655 pDS15, with a maltose-binding protein (MBP) and a methionine-free monomeric ultra-stable  
656 green fluorescent protein (-Met-muGFP) (Scott et al., 2018) attached respectively to the N-  
657 and C-termini of the receptor via HRV 3C protease cleavage sites. For the purpose of  
658 Kingfisher binding assays,  $\alpha_{1A}$ -AR variants were sub-cloned into a similar vector, pDS11, in  
659 which muGFP was replaced with mCherry since the excitation and emission wavelengths of  
660 fluorescent QAPB were overlapping with those of GFP. The final sequence of  $\alpha_{1A}$ -AR-A4

661 after purification (with residues left from HRV 3C cleavage) is:  
662 GPGSVFLSGNASDSSNSIQPPAPVNISKAILLGVILGGIILFGVLGNILVILSVACHRHLH  
663 SVTHYYVVYLAVADLLLTSTVMPFSAIYEV LGYWAFGRVFCNIWAAVDVLCCTASI  
664 MGLCIISIDRYIAVSYPLRYPTIVTQRRALMALLCVFALS LVISIGPLFGWRQPAPVDE  
665 TICQINEEPGYVLF SALGSFY LPLAILVMYCRVYV VAKRESRGLKSG LKTDKSDSEQ  
666 VTLRIHRKNAPAGGSGMASAKTKTHFSVRL LKFSREKKA AKTLGIVVGC FVLCWLPF  
667 FLVMPIGSFFPDFK PSETVFKIVLWLG YLNSCIKPIIY LCYSQEFK KAFQNV LRIQCLCR  
668 KQSASHHHHHHHHHGTRSLRGGLEVL FQ

669 In the  $\alpha_{1A}$ -AR-A4 (L312F) variant one stabilising mutation L312 was reversed to  
670 phenylalanine to improve the affinity of ligands compared to  $\alpha_{1A}$ -AR-A4.  $\alpha_{1A}$ -AR-A4-active  
671 (Y67N, K322N) is a signalling competent variant in which the two stabilizing mutations Y67  
672 and K322 were reverted to the wild-type asparagines.  $\alpha_{1A}$ -AR-A4 was used for NMR  
673 assignment, where each methionine was substituted to either leucine or isoleucine. All  
674 mutations were introduced through site-directed mutagenesis using PrimeSTAR DNA  
675 polymerase (TaKaRa).

676

### 677 $\alpha_{1A}$ -AR expression

678 All  $\alpha_{1A}$ -AR variants were expressed in *E. coli* C43 (DE3) cells (Lucigen, Middleton, WI). For  
679  $^{13}\text{C}^{\epsilon}\text{H}_3$ -methionine labelled expressions, 5 mL LB pre-culture containing 100 mg/L ampicillin  
680 and 1% (w/v) glucose was inoculated with a single colony of C43 cells freshly transformed  
681 with the expression plasmid and incubated at 37 °C, 225 rpm for approx. 8 h. 2 mL of the LB  
682 day culture was centrifuged (1700 rcf, 22 °C, 5 min) and the pellet was used to inoculate 100  
683 mL of a defined minimal medium (M1 medium) (Bumbak et al., 2018) as overnight pre-  
684 culture. 10 mL of the overnight pre-culture was used to inoculate 500 mL of M1 medium in 2  
685 L flasks. The expression cultures were incubated at 37 °C, 225 rpm to reach OD<sub>600</sub> of 0.6, at

686 which point 50 mg/L  $^{13}\text{C}^{\epsilon}\text{H}_3$ -methionine (Cambridge Stable Isotopes) was added along with  
687 100 mg/L of each lysine, threonine, phenylalanine, and 50 mg/L of each leucine, isoleucine  
688 and valine. The flasks were transferred to 20 °C and left shaking for 15 min prior to inducing  
689 protein expression with 250  $\mu\text{M}$  isopropyl  $\beta$ -D-1-thiogalactopyranoside (IPTG). After  
690 overnight expression (15-18 h, 20 °C, 225 rpm), the culture was harvested by centrifugation  
691 (2600 rcf, 4 °C, 15 min). The final pellet was snap frozen in liquid nitrogen and stored at -80  
692 °C. For unlabelled expression 5 mL of LB pre-culture was used to inoculate 500 mL 2YT  
693 medium containing 100 mg/L ampicillin and 0.4% (w/v) glucose. At  $\text{OD}_{600}$  of 0.6 the culture  
694 was chilled on ice for 2 min prior to inducing protein expression with 250  $\mu\text{M}$  IPTG  
695 overnight expression and harvesting were carried out as described above.

696

#### 697 **$\alpha_{1A}$ -AR purification**

698 The frozen cell pellet was thawed at room temperature for 30 min. 10 mL pellet was gently  
699 resuspended in 40 mL ice-cold solubilisation buffer [25 mM HEPES, pH 7.5, 200 mM NaCl,  
700 10% glycerol, 1% DDM (Anatrace), 0.12% CHS (cholesterol hemi succinate, Anatrace),  
701 0.6% CHAPS (Sigma), 50 mg lysozyme, 5 mg Dnase, one tablet of EDTA free complete  
702 protease inhibitor cocktail (Roche), 0.2-0.4 mM PMSF (phenylmethylsulfonyl fluoride)] and  
703 incubated on a turning wheel for 30 min at 4 °C. The cell membranes were then disrupted by  
704 sonication device (Diagenode Bioruptor Plus, high power, 10s on/20s off for 30 cycles)  
705 followed by another 1 h incubation at 4 °C on the turning wheel. The cell debris was removed  
706 by centrifugation (12,000 rcf, 4 °C, 40 min) and the supernatant was filtered using a 45  $\mu\text{m}$   
707 Durapore syringe filter (Merck Millipore). The cleared cell lysate was incubated with 3 mL  
708 Talon metal affinity resin pre-equilibrated with 45 mL equilibrium buffer (20 mM HEPES,  
709 pH 7.5, 300 mM NaCl, 10% glycerol, 0.05% DDM). After 1.5 h incubation at 4 °C, the resin  
710 retaining the receptor was washed three times with washing buffer 1 (20 mM HEPES, pH 7.5,



711 500 mM NaCl, 10% glycerol, 0.05% DDM) and then the full-length protein was eluted by 30  
712 mL elution buffer (20 mM HEPES, pH 7.5, 300 mM NaCl, 10% glycerol, 0.05% DDM, 250  
713 mM Imidazole). The eluate was concentrated down to 0.5-1 mL using a 100 kDa cut-off  
714 centrifugal filter device (Amicon Ultra, Millipore). Imidazole was removed by using a PD10  
715 desalting column (GE Healthcare). Cleavage of fusion proteins from the receptor was carried  
716 out overnight at 4 °C by adding 100 mM Na<sub>2</sub>SO<sub>4</sub>, 1 mM TCEP and 300 pmol GST-tagged  
717 HRV 3C protease (made in house).

718 The cleaved mixture was incubated for 1 h with 2 mL of pre-equilibrated Talon resin.  
719 The resin was washed using 30 mL washing buffer 2 (20 mM HEPES, pH 7.5, 300 mM  
720 NaCl, 10% glycerol, 0.05% DDM, 30 mM Imidazole) and the receptor was eluted by 20 mL  
721 elution buffer. The eluate was concentrated down to 450 µL by 30 kDa cut-off centrifugal  
722 filter device (Amicon Ultra, Millipore) and it was loaded onto a Superdex 200 10/300  
723 increase column (GE healthcare) equilibrated with SEC buffer (50 mM sodium phosphate,  
724 pH 7.5, 100 mM NaCl, 0.02% DDM). Size exclusion chromatography (SEC) was carried out  
725 at a flow rate of 0.5 mL/min. The peak fractions containing receptor were pooled and  
726 concentrated down to 100 µL using a 30 kDa cut-off centrifugal filter device (Amicon Ultra,  
727 Millipore). The sample buffer was exchanged twice to NMR buffer (50 mM sodium  
728 phosphate, pH 7.5, 100 mM NaCl, 99.9% D<sub>2</sub>O). Yields were generally between 0.5-1 mg  
729 receptor per litre of expression culture. Protein concentration was measured by BCA protein  
730 assay (Pierce, ThermoFisher).

731

### 732 **NMR spectroscopy**

733 NMR samples were prepared to 130 µL at 40-60 µM receptor in a 3 mm Shigemi NMR tubes  
734 (Shigemi Inc, Allison Park, PA). Ligands were added at saturating concentrations that were 2  
735 mM adrenaline for  $\alpha_{1A}$ -AR-A4 and  $\alpha_{1A}$ -AR-A4 (active), 400 µM prazosin, and 1 mM of other

736 ligands to all mutants (supplementary Table 1). Adrenaline was supplemented with 1 mM of  
737 the anti-oxidant ascorbic acid. Samples containing low affinity agonists (phenylephrine and  
738 adrenaline) were recycled via competition with high affinity ligands, exchange was judged  
739 via the chemical shift of the Met292<sup>6,55</sup> resonance. Experiments on  $\alpha_{1A}$ -AR-A4 and  $\alpha_{1A}$ -AR-  
740 A4-L312F, apo and all ligands were performed at least twice on independent receptor  
741 samples (biological replicates), except WB-4101 and phentolamine which were acquired  
742 once. Experiments on apo  $\alpha_{1A}$ -AR-A4-active and bound to prazosin, silodosin, and  
743 oxymetazoline were performed at least twice on independent receptor samples, and for other  
744 ligands were performed once.

745 All NMR spectra were collected at 25 °C on an 800-MHz Bruker Avance II  
746 spectrometer equipped with a triple resonance cryoprobe. 2D <sup>1</sup>H-<sup>13</sup>C SOFAST-HMQC  
747 (Schanda et al., 2005) spectra were recorded by excitation with a 2.25 ms PC9 120 degree <sup>1</sup>H  
748 pulse and refocusing with a 1 ms r-SNOB shaped 180 degree <sup>1</sup>H pulse. The spectral widths  
749 were set to 12 ppm and 25 ppm for <sup>1</sup>H and <sup>13</sup>C dimensions respectively. For the spectra  
750 recorded for  $\alpha_{1A}$ -AR-A4 variant (Figure 2 and Supplementary Figure 3), 1024 x 128 complex  
751 points were recorded with a 25% Poisson-gap sampling schedule and 2048 scans; an  
752 acquisition time of 8.5 h. For the other spectra, 1024 x 200 complex points were recorded  
753 with either traditional or 60% Poisson-gap sampling schedule and 368 scans resulting in  
754 acquisition times of 10 h and 6 h respectively. Spectra were reconstructed with compressed  
755 sensing using qMDD and processed using NMRpipe (Delaglio et al., 1995) where data were  
756 multiplied by cosine bell functions and zero-filled once in each dimension. Spectra were  
757 analysed in NMRFAM-Sparky(Lee et al., 2015) (Goddard, T.D. and Kneller, D.G, University  
758 of California, San Francisco).

759 The average chemical shift differences,  $\Delta\delta$ , were normalised using the equation  
760  $\Delta\delta=[(\Delta\delta_{1H})^2+(\Delta\delta_{13C}/3.5)^2]^{0.5}$ . The error values were calculated by the formula

761  $[\Delta\delta_{1H} * R_{1H} + \Delta\delta_{13C} * R_{13C} / (3.5)^2] / \Delta\delta$ , where  $R_{1H}$  and  $R_{13C}$  are the digital resolutions in ppm in  
762 the  $^1H$  and  $^{13}C$  dimensions respectively (Kofuku et al., 2012).

763

#### 764 **Saturation and Competition binding assays**

765 1 nmol purified full-length  $\alpha_{1A}$ -AR variant (mCherry attached) was resuspended in 10 mL  
766 assay buffer (20 mM HEPES, pH 7.5, 100 mM NaCl, 0.02% DDM) and immobilized onto  
767 200  $\mu$ L of Dynabeads (Streptavidin T1) for 30 min at 4  $^{\circ}C$ . 100  $\mu$ L of the suspension  
768 containing beads with immobilized receptor was aliquoted to a 96-DeepWell plate from  
769 which the beads transferred to another 96-DeepWell plate containing 100  $\mu$ L ligand solution  
770 using a KingFisher Flex magnetic particle processor. For saturation binding, immobilized  
771 receptors in each well were incubated with 100  $\mu$ L assay buffer containing increased  
772 concentration (0, 3.125, 6.25, 12.5, 25, 50, 100, 200 nM) of QAPB (Quinazoline Piperazine  
773 Bodipy) for 2 h at 22  $^{\circ}C$ . Nonspecific binding was determined by repeating the experiment  
774 in the presence of 10  $\mu$ M of prazosin. For competition binding, immobilized receptors were  
775 incubated with 100  $\mu$ L of assay buffer containing 10 nM QAPB with the addition of ligands  
776 at various concentrations, as shown in the Supplementary Figures 5 and 8, for 2 h at 22  $^{\circ}C$ .  
777 Immobilised receptors were subsequently washed with 200  $\mu$ L of assay buffer and  
778 resuspended in 100  $\mu$ L assay buffer. 90  $\mu$ L of the final beads solution was transferred to a 96-  
779 well Greiner Bio-One nonbinding black plate. Fluorescence of bound QAPB was measured  
780 using a POLARstar OMEGA plate reader (BMG Labtech, Ortenburg, Germany) and  
781 normalised to mCherry fluorescence which was detected simultaneously. Data represent the  
782 mean  $\pm$  standard deviation (SD) of three independent biological replicate experiments each  
783 performed in duplicate technical measurements. To compare ligand binding affinities at  $\alpha_{1A}$ -  
784 AR-A4 (L312F) and  $\alpha_{1A}$ -AR-A4-active of to  $\alpha_{1A}$ -AR-A4, raw data from our previously

785 published paper (Yong et al., 2018), were reanalysed and presented in Supplementary Table  
786 1.

787

### 788 **Thermostability assay**

789 1 nM purified full-length  $\alpha_{1A}$ -AR-A4 or  $\alpha_{1A}$ -AR-A4-active (mCherry attached) was prepared  
790 in base buffer (20 mM HEPES, 100 mM NaCl, 0.1% DDM). To measure thermostability of  
791 receptors in the apo-state, 100  $\mu$ L of receptor solution was aliquoted into 24 wells of a 96-  
792 well PCR plate. 10 of the 12 duplicates were heated in gradient temperatures for 30 min and  
793 the two remaining duplicates were left at 4 °C for normalisation. After thermo-treatment, the  
794 receptors were transferred to a KingFisher 96-DeepWell plate containing 2  $\mu$ L paramagnetic  
795 Dynabeads per well (streptavidin T1, ThermoFisher Scientific). The following few steps were  
796 automatically performed by using a KingFisher 96 magnetic particle processor. The receptor  
797 was firstly incubated with magnetic beads for 30 min at 4 °C. Then, magnetic beads were  
798 transferred to another 96-DeepWell plate containing 100  $\mu$ L ligand solution (20 mM HEPES,  
799 100 mM NaCl, 0.1% DDM, 100 nM QAPB). The non-specific binding was determined by  
800 competing QAPB with 100  $\mu$ L prazosin. After 1.5 h incubation, immobilised receptors were  
801 subsequently washed with 200  $\mu$ L of assay buffer and resuspended in 100  $\mu$ L assay buffer. 90  
802  $\mu$ L of the final beads solution was transferred to a 96-well Greiner Bio-One nonbinding black  
803 plate. Fluorescence of bound QAPB was measured using a POLARstar OMEGA plate reader  
804 (BMG Labtech, Ortenburg, Germany) and normalised to mCherry fluorescence which was  
805 detected simultaneously. To measure the thermostability of  $\alpha_{1A}$ -AR variants in the presence  
806 of ligand, receptors were preincubated with 100 nM QAPB for 1 h on ice prior to be heated at  
807 varying temperatures. The remaining steps were carried out as described for apo state  
808 thermostability assay. Data represent the mean  $\pm$  SD of three independent biological replicate  
809 experiments each performed in duplicate technical replicate measurements.

810

811 **IP<sub>1</sub> assay**

812 Gαq/11 signalling assays were carried out using the IP-One HTRF® Assay Kit (Cisbio  
813 Bioassays, France) measuring inositol phosphate (IP<sub>1</sub>) using the manufacturer's protocol.  
814 COS-7 cells were seeded at 25,000 cells per well in a 96-well plate and incubated overnight  
815 at 37 °C and 5% CO<sub>2</sub> in Dulbecco's modified Eagle medium (DMEM) (Gibco, Gaithersburg,  
816 USA) supplemented with 10% FBS (Scientifix Life, Melbourne, Australia), 1% L-Glutamine  
817 (Gibco) and 1% penicillin/streptomycin (Gibco). Cells were transfected with pcDNA3.1  
818 constructs of WT or mutant α<sub>1A</sub>-ARs using Lipofectamine 2000 (Invitrogen, Carlsbad, USA)  
819 at 0.25 µg DNA per well. 24 h later, cells were stimulated with ligands for 2 h at 37 °C in 40  
820 µL of Stimulation Buffer, then frozen at -80 °C. 14 µL of thawed sample were transferred to  
821 a white HTRF® 384-well Optiplate (PerkinElmer, Waltham, USA), incubated with  
822 development reagents in the dark for 1 h with shaking, and analysed by time-resolved  
823 fluorescence using a POLARstar OMEGA plate reader (BMG Labtech, Ortenburg,  
824 Germany). Data were analysed against the kit's standard curve. Data represent mean ± SD of  
825 three independent biological replicate experiments each performed in triplicate technical  
826 replicate measurements, unless otherwise stated in the figure legends.

827

828 **NanoBiT G Protein Activity Assay**

829 COS-7 cells grown in 10% fetal bovine serum (FBS), 1% L-Glutamine, 1%  
830 penicillin/streptomycin DMEM media were seeded at 250,000 cells per well on a six-well  
831 plate. Cells were then transiently co-transfected in the six-well plate, with 0.1 µg Gα<sub>q</sub>-LgBiT  
832 (GNAQ-11S) DNA, 0.5 µg Gβ-untagged (GNB1) DNA, 0.5 µg Gγ-SmBiT (114-GnG<sub>2</sub>)  
833 DNA, 0.2 µg Guanine Release Factor (RIC8A) DNA and 0.5 µg α<sub>1A</sub>-AR (or respective AR  
834 mutants) DNA using Lipofectamine 2000 transfection reagent as per the manufacturer's

835 instructions. The next day the cells were resuspended in Phenol-Red-free (PRF) DMEM  
836 media containing 10% FBS, 1% L-Glutamine, 1% penicillin/streptomycin, 25 mM HEPES  
837 and seeded at 50,000 cells per well to a white 96-well plate and incubated overnight. On the  
838 day of the assay, plates were pre-incubated with 10  $\mu$ M Furimazine for 1 hour. Following  
839 incubation, raw luminescence counts in each well were measured every 12 sec over the  
840 course of the assay using a POLARstar Omega plate reader (BMG Labtech). Cells were  
841 treated with either vehicle or a saturating concentration of each ligand (50 nM for A-61603  
842 and 100 nM for antagonists). Luminescence counts were plotted against time, with the final  
843 pre-incubation reading assigned as the zero-time point (time of vehicle/ligand addition). A  
844 baseline correction was then performed by subtracting the luminescence counts in the  
845 vehicle-treated samples from the ligand-treated samples which resulted in a time-course plot  
846 of ligand-induced luminescence counts. Initial raw luminescence counts were used as a  
847 readout of G protein expression levels. Data represent the mean  $\pm$  standard error (SEM) of  
848 three independent biological replicate experiments each performed in triplicate technical  
849 replicate measurements, unless otherwise stated in the figure legends.

850

### 851 **Intracellular Ca<sup>2+</sup> Mobilization Assays**

852 COS-7 cells were seeded in 10 cm culture dishes at  $3 \times 10^6$  cells per dish and allowed to grow  
853 overnight at 37 °C, 5% CO<sub>2</sub> in Dulbecco's modified Eagle medium (DMEM) supplemented  
854 with 10% FBS, 1% L-Glutamine and 1% penicillin/streptomycin (Life Technologies,  
855 California, USA). The next day the cells were transfected with 30  $\mu$ g of receptor DNA  
856 construct (pcDNA3.1 expression vector containing WT or mutant  $\alpha_{1A}$ -ARs) using 60  $\mu$ l of  
857 Lipofectamine 2000 (Invitrogen) transfecting reagent per dish. The following day, cells were  
858 transferred to 96-well culture plates ( $5 \times 10^4$  cells per well) and allowed to grow overnight. On  
859 the day of the experiment cells were washed twice with Ca<sup>2+</sup> assay buffer [150 mM NaCl, 2.6

860 mM KCl, 1.2 mM MgCl<sub>2</sub>, 10 mM D-glucose, 10 mM HEPES, 2.2 mM CaCl<sub>2</sub>, 0.5% (w/v)  
861 BSA, and 4 mM probenecid, pH 7.4] and incubated in Ca<sup>2+</sup> assay buffer containing 1 mM  
862 Fluo-4-AM for 1 h in the dark at 37 °C and 5% CO<sub>2</sub>. After two washes with Ca<sup>2+</sup> assay buffer,  
863 fluorescence was measured for 1.5 min upon the addition of ligands in a Flexstation 3  
864 (Molecular Devices, Sunnyvale, CA) using an excitation wavelength of 485 nm and emission  
865 wavelength of 520 nm. Data were normalized to the peak response elicited by 3 μM  
866 Ionomycin (Life Technologies). Data represent the mean ± SD of three independent  
867 biological replicate experiments each performed in triplicate technical replicate  
868 measurements, unless otherwise stated in the figure legends.

869

### 870 **Homology Modelling**

871 Homology models of inactive- and active-state α<sub>1A</sub>-AR were built with I-TASSER (Zhang et  
872 al., 2015) using crystal structures of β<sub>2</sub>-AR as the templates. For inactive state models, the  
873 structure of β<sub>2</sub>-AR bound to the antagonist carazolol and the inactive-state stabilizing  
874 nanobody, Nb60 (PDB ID: 5JQH) (Staus et al., 2016) was used as a template. For the active  
875 state models, the crystal structure of a β<sub>2</sub>-AR-Gs protein complex bound to the agonist BI-  
876 167107 (PDB ID: 3SN6) (Rasmussen et al., 2011) was used as a template. The N- and C-  
877 terminal regions as well as the ICL3 regions, which have no sequence similarity to the  
878 template, were deleted from the model. Energy minimisation was performed using Minimize  
879 tool in Maestro version 11.7.012 (Schrödinger, Inc.) under OPLS 2005 (Siu et al., 2012)  
880 forcefield.

881

882



883

## 884 **References**

- 885 Ahuja, S., and Smith, S.O. (2009). Multiple switches in G protein-coupled receptor activation. Trends  
886 Pharmacol Sci 30, 494-502.
- 887 Akinaga, J., Garcia-Sainz, J.A., and Pupo, A.S. (2019). Updates in the Function and Regulation of  
888 alpha1 -Adrenoceptors. Br J Pharmacol.
- 889 Bokoch, M.P., Zou, Y., Rasmussen, S.G., Liu, C.W., Nygaard, R., Rosenbaum, D.M., Fung, J.J., Choi,  
890 H.J., Thian, F.S., Kobilka, T.S., Puglisi, J.D., Weis, W.I., Pardo, L., Prosser, R.S., Mueller, L., and Kobilka,  
891 B.K. (2010). Ligand-specific regulation of the extracellular surface of a G-protein-coupled receptor.  
892 Nature 463, 108-112.
- 893 Bumbak, F., Bathgate, R.A.D., Scott, D.J., and Gooley, P.R. (2019). Expression and Purification of a  
894 Functional E. coli (13)CH3-Methionine-Labeled Thermostable Neurotensin Receptor 1 Variant for  
895 Solution NMR Studies. Methods Mol Biol 1947, 31-55.
- 896 Bumbak, F., Keen, A.C., Gunn, N.J., Gooley, P.R., Bathgate, R.A.D., and Scott, D.J. (2018).  
897 Optimization and (13)CH3 methionine labeling of a signaling competent neurotensin receptor 1  
898 variant for NMR studies. Biochim Biophys Acta 1860, 1372-1383.
- 899 Butterfoss, G., DeRose, E., Gabel, S., Perera, L., Krahn, J., Mueller, G., Zheng, X., and London, R.  
900 (2010). Conformational dependence of 13C shielding and coupling constants for methionine methyl  
901 groups. Journal of biomolecular NMR 48, 31-47.
- 902 Carpenter, B., and Tate, C.G. (2017). Active state structures of G protein-coupled receptors highlight  
903 the similarities and differences in the G protein and arrestin coupling interfaces. Curr Opin Struct Biol  
904 45, 124-132.
- 905 Casiraghi, M., Damian, M., Lescop, E., Point, E., Moncoq, K., Morellet, N., Levy, D., Marie, J., Guittet,  
906 E., Baneres, J.L., and Catoire, L.J. (2016). Functional Modulation of a G Protein-Coupled Receptor  
907 Conformational Landscape in a Lipid Bilayer. J Am Chem Soc 138, 11170-11175.
- 908 Clark, L.D., Dikiy, I., Chapman, K., Rodstrom, K.E., Aramini, J., LeVine, M.V., Khelashvili, G.,  
909 Rasmussen, S.G., Gardner, K.H., and Rosenbaum, D.M. (2017). Ligand modulation of sidechain  
910 dynamics in a wild-type human GPCR. Elife 6.
- 911 Cotecchia, S., Schwinn, D.A., Randall, R.R., Lefkowitz, R.J., Caron, M.G., and Kobilka, B.K. (1988).  
912 Molecular cloning and expression of the cDNA for the hamster alpha 1-adrenergic receptor.  
913 Proceedings of the National Academy of Sciences of the United States of America 85, 7159-7163.
- 914 Delaglio, F., Grzesiek, S., Vuister, G.W., Zhu, G., Pfeifer, J., and Bax, A. (1995). NMRPipe: a  
915 multidimensional spectral processing system based on UNIX pipes. J Biomol NMR 6, 277-293.
- 916 Deupi, X., and Standfuss, J. (2011). Structural insights into agonist-induced activation of G-protein-  
917 coupled receptors. Curr Opin Struct Biol 21, 541-551.
- 918 Dror, R.O., Arlow, D.H., Maragakis, P., Mildorf, T.J., Pan, A.C., Xu, H., Borhani, D.W., and Shaw, D.E.  
919 (2011). Activation mechanism of the beta2-adrenergic receptor. Proc Natl Acad Sci U S A 108, 18684-  
920 18689.
- 921 Eddy, M.T., Didenko, T., Stevens, R.C., and Wuthrich, K. (2016). beta2-Adrenergic Receptor  
922 Conformational Response to Fusion Protein in the Third Intracellular Loop. Structure 24, 2190-2197.
- 923 Eddy, M.T., Lee, M.Y., Gao, Z.G., White, K.L., Didenko, T., Horst, R., Audet, M., Stanczak, P., McClary,  
924 K.M., Han, G.W., Jacobson, K.A., Stevens, R.C., and Wuthrich, K. (2018). Allosteric Coupling of Drug  
925 Binding and Intracellular Signaling in the A2A Adenosine Receptor. Cell 172, 68-80 e12.
- 926 Garcia-Nafria, J., and Tate, C.G. (2019). Cryo-EM structures of GPCRs coupled to Gs, Gi and Go. Mol  
927 Cell Endocrinol 488, 1-13.
- 928 Horst, R., Liu, J., Stevens, R., and Wüthrich, K. (2013).  $\beta$ 2-Adrenergic Receptor Activation by Agonists  
929 Studied with 19F NMR Spectroscopy. Angewandte Chemie 125, 10962-10965.
- 930 Hwa, J., Graham, R.M., and Perez, D.M. (1995). Identification of critical determinants of alpha 1-  
931 adrenergic receptor subtype selective agonist binding. J Biol Chem 270, 23189-23195.



932 Inoue, A., Raimondi, F., Kadji, F.M.N., Singh, G., Kishi, T., Uwamizu, A., Ono, Y., Shinjo, Y., Ishida, S.,  
933 Arang, N., Kawakami, K., Gutkind, J.S., Aoki, J., and Russell, R.B. (2019). Illuminating G-Protein-  
934 Coupling Selectivity of GPCRs. *Cell*.  
935 Isberg, V., de Graaf, C., Bortolato, A., Cherezov, V., Katritch, V., Marshall, F., Mordalski, S., Pin, J.-P.,  
936 Stevens, R., Vriend, G., and Gloriam, D. (2015). Generic GPCR residue numbers – aligning topology  
937 maps while minding the gaps. *Trends in pharmacological sciences (Regular ed, Print)* *36*, 22-31.  
938 Isogai, S., Deupi, X., Opitz, C., Heydenreich, F.M., Tsai, C.J., Brueckner, F., Schertler, G.F., Vepintsev,  
939 D.B., and Grzesiek, S. (2016). Backbone NMR reveals allosteric signal transduction networks in the  
940 beta1-adrenergic receptor. *Nature* *530*, 237-241.  
941 Kofuku, Y., Ueda, T., Okude, J., Shiraishi, Y., Kondo, K., Maeda, M., Tsujishita, H., and Shimada, I.  
942 (2012). Efficacy of the beta(2)-adrenergic receptor is determined by conformational equilibrium in  
943 the transmembrane region. *Nat Commun* *3*, 1045.  
944 Kofuku, Y., Ueda, T., Okude, J., Shiraishi, Y., Kondo, K., Mizumura, T., Suzuki, S., and Shimada, I.  
945 (2014). Functional dynamics of deuterated beta2 -adrenergic receptor in lipid bilayers revealed by  
946 NMR spectroscopy. *Angew Chem Int Ed Engl* *53*, 13376-13379.  
947 Latorraca, N.R., Venkatakrishnan, A.J., and Dror, R.O. (2017). GPCR Dynamics: Structures in Motion.  
948 *Chem Rev* *117*, 139-155.  
949 Lee, W., Tonelli, M., and Markley, J.L. (2015). NMRFAM-SPARKY: enhanced software for  
950 biomolecular NMR spectroscopy. *Bioinformatics* *31*, 1325-1327.  
951 Liu, J.J., Horst, R, et al. (2012). biased signaling pathways in beta2-AR characterized by 19F-NMR  
952 Science.  
953 Manglik, A., Kim, T.H., Masureel, M., Altenbach, C., Yang, Z., Hilger, D., Lerch, M.T., Kobilka, T.S.,  
954 Thian, F.S., Hubbell, W.L., Prosser, R.S., and Kobilka, B.K. (2015). Structural Insights into the Dynamic  
955 Process of beta2-Adrenergic Receptor Signaling. *Cell* *161*, 1101-1111.  
956 Manglik, A., and Kruse, A.C. (2017). Structural Basis for G Protein-Coupled Receptor Activation.  
957 *Biochemistry* *56*, 5628-5634.  
958 Nygaard, R., Zou, Y., Dror, R.O., Mildorf, T.J., Arlow, D.H., Manglik, A., Pan, A.C., Liu, C.W., Fung, J.J.,  
959 Bokoch, M.P., Thian, F.S., Kobilka, T.S., Shaw, D.E., Mueller, L., Prosser, R.S., and Kobilka, B.K. (2013).  
960 The dynamic process of beta(2)-adrenergic receptor activation. *Cell* *152*, 532-542.  
961 Okude, J., Ueda, T., Kofuku, Y., Sato, M., Nobuyama, N., Kondo, K., Shiraishi, Y., Mizumura, T., Onishi,  
962 K., Natsume, M., Maeda, M., Tsujishita, H., Kuranaga, T., Inoue, M., and Shimada, I. (2015).  
963 Identification of a Conformational Equilibrium That Determines the Efficacy and Functional  
964 Selectivity of the mu-Opioid Receptor. *Angew Chem Int Ed Engl* *54*, 15771-15776.  
965 Perez, D., and Doze, V. (2011). Cardiac and neuroprotection regulated by alpha(1)-adrenergic  
966 receptor subtypes. *Journal of receptor and signal transduction research* *31*, 98-110.  
967 Rasmussen, S.G., DeVree, B.T., Zou, Y., Kruse, A.C., Chung, K.Y., Kobilka, T.S., Thian, F.S., Chae, P.S.,  
968 Pardon, E., Calinski, D., Mathiesen, J.M., Shah, S.T., Lyons, J.A., Caffrey, M., Gellman, S.H., Steyaert,  
969 J., Skinotitis, G., Weis, W.I., Sunahara, R.K., and Kobilka, B.K. (2011). Crystal structure of the beta2  
970 adrenergic receptor-Gs protein complex. *Nature* *477*, 549-555.  
971 Schanda, P., Kupce, E., and Brutscher, B. (2005). SOFAST-HMQC experiments for recording two-  
972 dimensional heteronuclear correlation spectra of proteins within a few seconds. *J Biomol NMR* *33*,  
973 199-211.  
974 Scott, D.J., Gunn, N.J., Yong, K.J., Wimmer, V.C., Veldhuis, N.A., Challis, L.M., Haidar, M., Petrou, S.,  
975 Bathgate, R.A.D., and Griffin, M.D.W. (2018). A Novel Ultra-Stable, Monomeric Green Fluorescent  
976 Protein For Direct Volumetric Imaging of Whole Organs Using CLARITY. *Sci Rep* *8*, 667.  
977 Scott, D.J., and Pluckthun, A. (2013). Direct molecular evolution of detergent-stable G protein-  
978 coupled receptors using polymer encapsulated cells. *J Mol Biol* *425*, 662-677.  
979 Shimada, I., Ueda, T., Kofuku, Y., Eddy, M.T., and Wuthrich, K. (2018). GPCR drug discovery:  
980 integrating solution NMR data with crystal and cryo-EM structures. *Nat Rev Drug Discov*.  
981 Siu, S.W., Pluhackova, K., and Bockmann, R.A. (2012). Optimization of the OPLS-AA Force Field for  
982 Long Hydrocarbons. *J Chem Theory Comput* *8*, 1459-1470.

983 Solt, A.S., Bostock, M.J., Shrestha, B., Kumar, P., Warne, T., Tate, C.G., and Nietlispach, D. (2017).  
984 Insight into partial agonism by observing multiple equilibria for ligand-bound and Gs-mimetic  
985 nanobody-bound beta1-adrenergic receptor. *Nat Commun* 8, 1795.  
986 Sounier, R., Mas, C., Steyaert, J., Laeremans, T., Manglik, A., Huang, W., Kobilka, B.K., Demene, H.,  
987 and Granier, S. (2015). Propagation of conformational changes during mu-opioid receptor activation.  
988 *Nature* 524, 375-378.  
989 Staus, D.P., Strachan, R.T., Manglik, A., Pani, B., Kahsai, A.W., Kim, T.H., Wingler, L.M., Ahn, S.,  
990 Chatterjee, A., Masoudi, A., Kruse, A.C., Pardon, E., Steyaert, J., Weis, W.I., Prosser, R.S., Kobilka,  
991 B.K., Costa, T., and Lefkowitz, R.J. (2016). Allosteric nanobodies reveal the dynamic range and  
992 diverse mechanisms of G-protein-coupled receptor activation. *Nature* 535, 448-452.  
993 Trzaskowski, B., Latek, D., Yuan, S., Ghoshdastider, U., Debinski, A., and Filipek, S. (2012). Action of  
994 molecular switches in GPCRs--theoretical and experimental studies. *Curr Med Chem* 19, 1090-1109.  
995 Xu, J., Hu, Y., Kaindl, J., Risel, P., Hubner, H., Maeda, S., Niu, X., Li, H., Gmeiner, P., Jin, C., and  
996 Kobilka, B.K. (2019). Conformational Complexity and Dynamics in a Muscarinic Receptor Revealed by  
997 NMR Spectroscopy. *Mol Cell*.  
998 Ye, L., Neale, C., Sljoka, A., Lyda, B., Pichugin, D., Tsuchimura, N., Larda, S.T., Pomes, R., Garcia, A.E.,  
999 Ernst, O.P., Sunahara, R.K., and Prosser, R.S. (2018). Mechanistic insights into allosteric regulation of  
1000 the A2A adenosine G protein-coupled receptor by physiological cations. *Nat Commun* 9, 1372.  
1001 Ye, L., Van Eps, N., Zimmer, M., Ernst, O.P., and Prosser, R.S. (2016). Activation of the A2A adenosine  
1002 G-protein-coupled receptor by conformational selection. *Nature* 533, 265-268.  
1003 Yong, K.J., Vaid, T.M., Shilling, P.J., Wu, F.J., Williams, L.M., Deluigi, M., Pluckthun, A., Bathgate,  
1004 R.A.D., Gooley, P.R., and Scott, D.J. (2018). Determinants of Ligand Subtype-Selectivity at alpha1A-  
1005 Adrenoceptor Revealed Using Saturation Transfer Difference (STD) NMR. *ACS Chem Biol* 13, 1090-  
1006 1102.  
1007 Zhang, J., Yang, J., Jang, R., and Zhang, Y. (2015). GPCR-I-TASSER: A Hybrid Approach to G Protein-  
1008 Coupled Receptor Structure Modeling and the Application to the Human Genome. *Structure* 23,  
1009 1538-1549.  
1010 Zhu, J., Taniguchi, T., Takauji, R., Suzuki, F., Tanaka, T., and Muramatsu, I. (2000). Inverse agonism  
1011 and neutral antagonism at a constitutively active alpha-1a adrenoceptor. *British Journal of*  
1012 *Pharmacology* 131, 546-552.

1013

1014



## Agonist

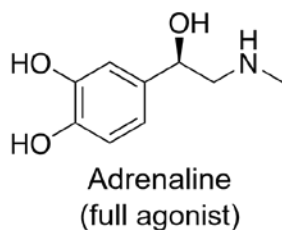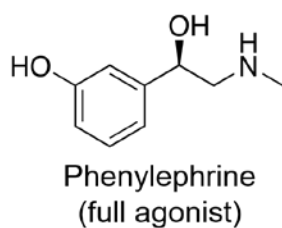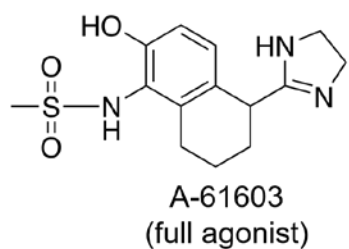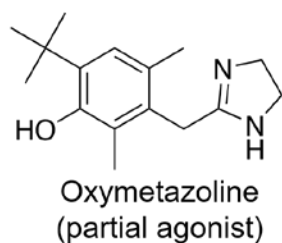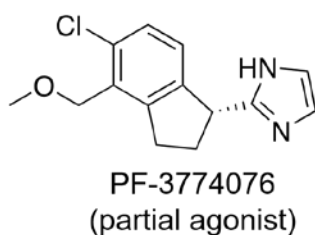

## Inverse agonist & Neutral antagonist

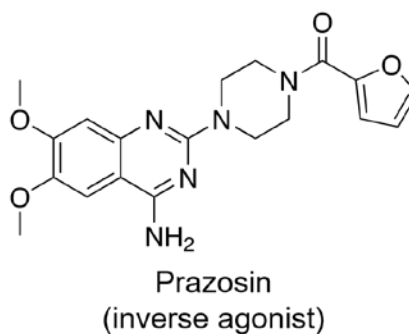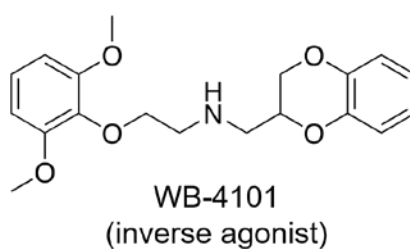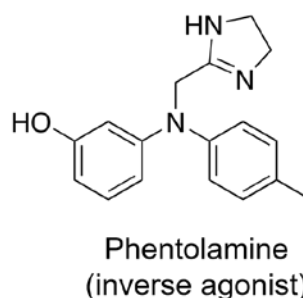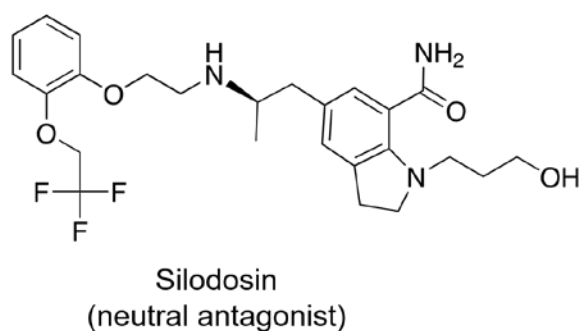

Supplementary Figure 2. Chemical structures of ligands used in this study.

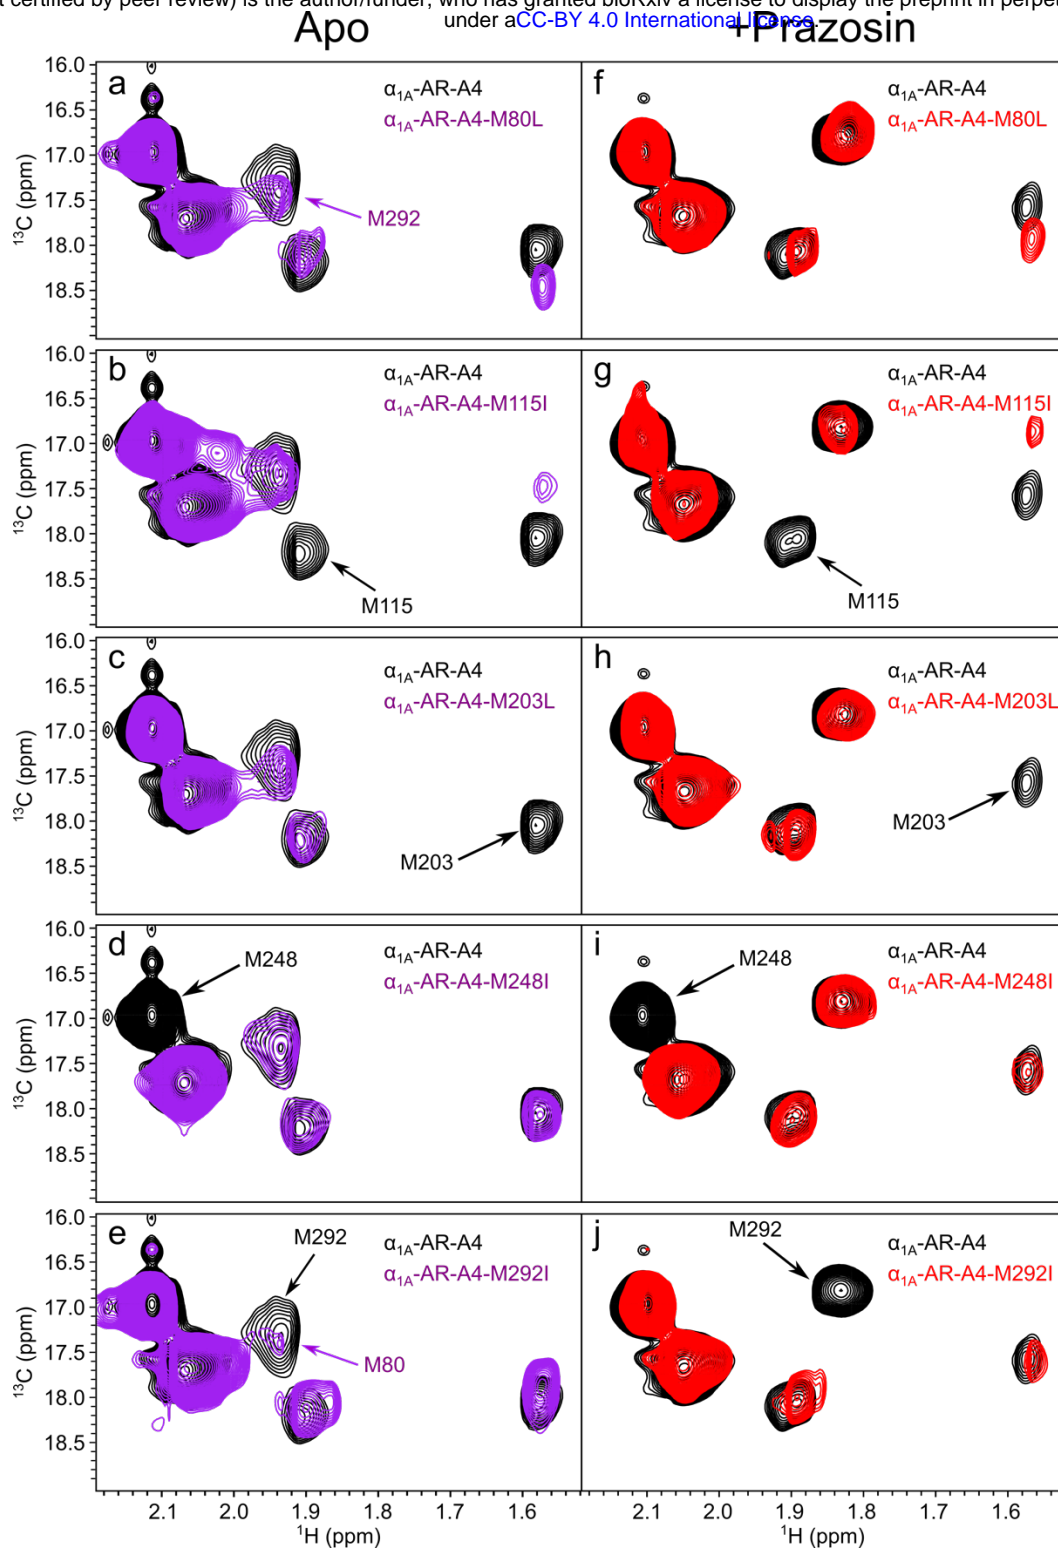

**Supplementary Figure 3. Assignment of  $^{13}\text{C}$  methyl labelled methionine residues in  $\alpha_{1A}$ -AR-A4.** Five methionine residues in  $\alpha_{1A}$ -AR-A4 were individually mutated to either Leucine or Isoleucine, M80L (a,f); M115I (b,g); M203L (c,h); M248I (d,i); M292I (e,j). The  $^1\text{H}$ - $^{13}\text{C}$  SOFAST HMQC spectra of five  $\alpha_{1A}$ -AR-A4 mutants were collected in apo state (a-e, purple) and prazosin-bound state (f-j, red). Spectra of all mutants overlay with the spectrum of  $\alpha_{1A}$ -AR-A4 in the apo or prazosin-bound state (black).

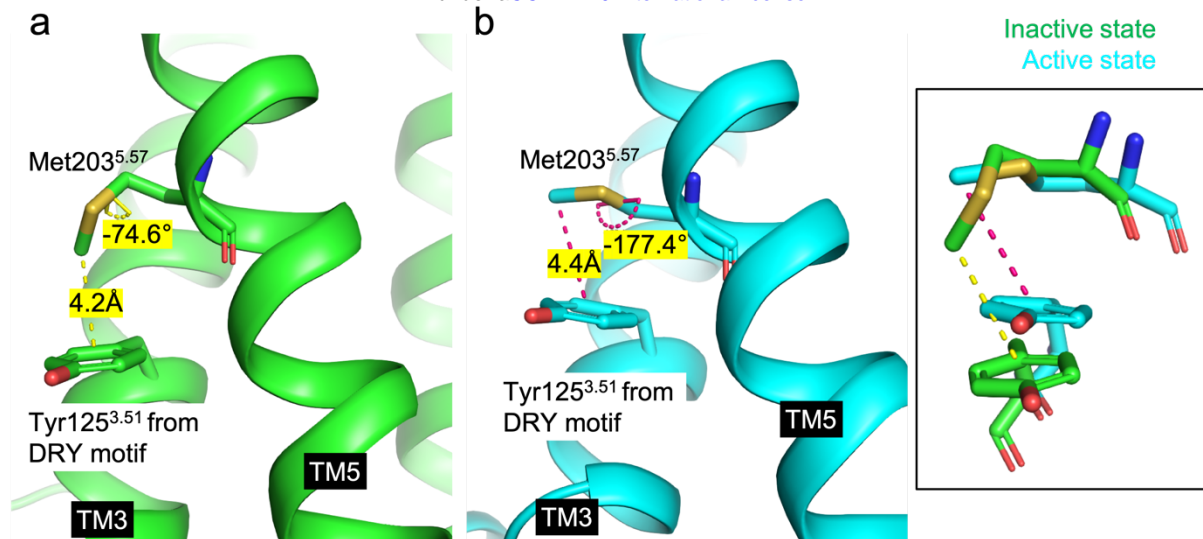

**Supplementary Figure 4. The local environment of Met203<sup>5.57</sup> and its  $\chi_3$  dihedral angle.** The methyl group of Met203<sup>5.57</sup> sits on top of Tyr125<sup>3.51</sup> of the DRY motif as shown in the  $\alpha_{1A}$ -AR-A4 homology models, and is expected to experience a ring current effect from Tyr125<sup>3.51</sup>. (a) In the inactive state of  $\alpha_{1A}$ -AR-A4 model (green), the distance between the methyl of Met203<sup>5.57</sup> and the ring of Tyr125<sup>3.51</sup> is 4.2 Å. The  $\chi_3$  dihedral angle of Met203<sup>5.57</sup> is -74.6°, which means the  $\chi_3$  in the inactive state is averaging between gauche and trans conformers. (b) In the active state of  $\alpha_{1A}$ -AR-A4 model (cyan), the distance between the methyl of Met203<sup>5.57</sup> and the ring of Tyr125<sup>3.51</sup> is 4.4 Å. The  $\chi_3$  dihedral angle of Met203<sup>5.57</sup> is -177.4°, which means the  $\chi_3$  in the active state is in a near trans conformer.



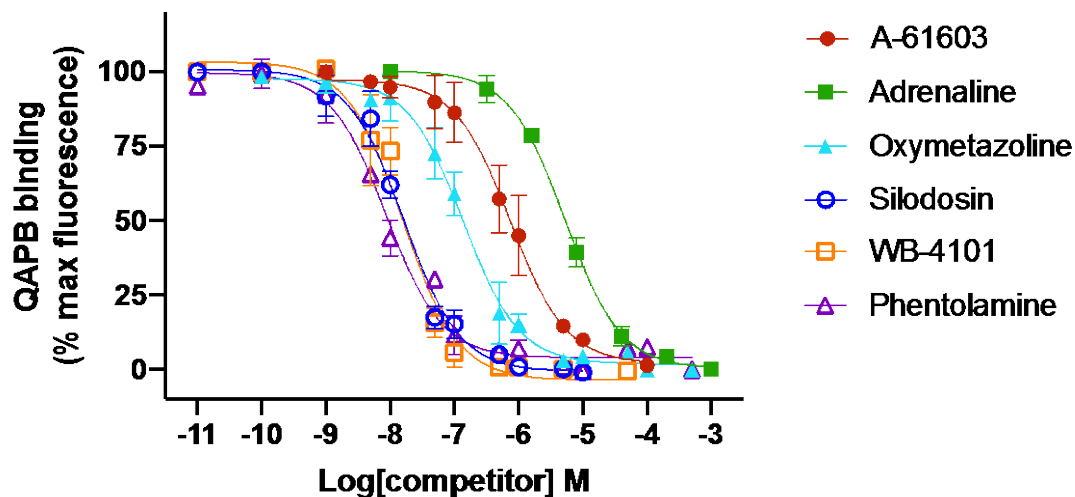

**Supplementary Figure 5. Characterisation of ligand affinity to  $\alpha_{1A}$ -AR-A4 (L312F).** QAPB competition binding for 2 hours at 22 °C against purified  $\alpha_{1A}$ -AR-A4 (L312F) with A-61603 (maroon, solid circles), adrenaline (green, solid squares), oxymetazoline (cyan, solid triangles), silodosin (blue, open circles), WB-4101 (orange, open squares) and phentolamine (purple, open triangles).

Supplementary Table 1. Measured affinities of ligands utilised in the present study.<sup>a</sup>

|                 | $\alpha_{1A}$ -AR WT   | $\alpha_{1A}$ -AR-A4     | $\alpha_{1A}$ -AR-A4 (L312F) | $\alpha_{1A}$ -AR-A4-active |
|-----------------|------------------------|--------------------------|------------------------------|-----------------------------|
| QAPB $K_D$ (nM) | N.D                    | $11.6 \pm 2.0^1$         | $30.3 \pm 21.2$              | $29.2 \pm 15.1$             |
|                 | $K_i^b$                | $K_i$                    | $K_i$                        | $K_i$                       |
| Adrenaline      | $3.3 \pm 0.4 \mu M^2$  | $>1.0 mM^1$              | $2.7 \pm 0.5 \mu M$          | $0.4 \pm 0.1 mM$            |
| Phenylephrine   | $6.2 \pm 1.5 \mu M^2$  | $\sim 0.6 mM^1$          | $41.9 \pm 26.6 \mu M^1$      | $1.6 \pm 0.6 mM$            |
| A-61603         | $\sim 79.4 nM^3$       | $113.5 \pm 47.2 \mu M^1$ | $0.4 \pm 0.2 \mu M$          | $18.4 \pm 18.9 \mu M$       |
| Oxymetazoline   | $6.7 \pm 0.9 nM^4$     | $52.8 \pm 8.0 \mu M$     | $65.7 \pm 24.4 nM$           | $9.7 \pm 6.4 \mu M$         |
| PF-3774076      | $\sim 83.0 nM^5$       | N.D                      | N.D                          | $19.4 \pm 12.9 \mu M$       |
| Silodosin       | $0.036 \pm 0.010 nM^4$ | N.D                      | $8.4 \pm 1.9 nM$             | N.D                         |
| Phentolamine    | $2.7 \pm 0.1 nM^4$     | N.D                      | $3.9 \pm 2.0 nM$             | N.D                         |
| WB-4101         | $0.21 \pm 0.03 nM^4$   | N.D                      | $7.6 \pm 3.4 nM$             | N.D                         |
| Prazosin        | $0.17 \pm 0.02 nM^4$   | $57.0 \pm 11.8 nM^1$     | $7.5 \pm 3.8 nM^1$           | N.D                         |

<sup>a</sup>Data are presented as mean  $K_i \pm SD$  and mean  $K_D \pm SD$ , except for the data cited from the literature which are mean  $K_i \pm SEM$  and mean  $K_D \pm SEM$ . Three independent biological replicate experiments (n=3) were done for all data. N.D, not determined. <sup>b</sup>These  $K_i$  were measured on cells overexpressed with WT human  $\alpha_{1A}$ -AR.  $K_i$  of ligands on  $\alpha_{1A}$ -AR-A4,  $\alpha_{1A}$ -AR-A4 (L312F) and  $\alpha_{1A}$ -AR-A4-active were determined with purified receptors using Kingfisher binding assay (see methods). For some ligand-receptor pairings, full displacement in competition binding assays was not observed, and thus only approximate  $K_i$  values could be estimated (indicated with ~)



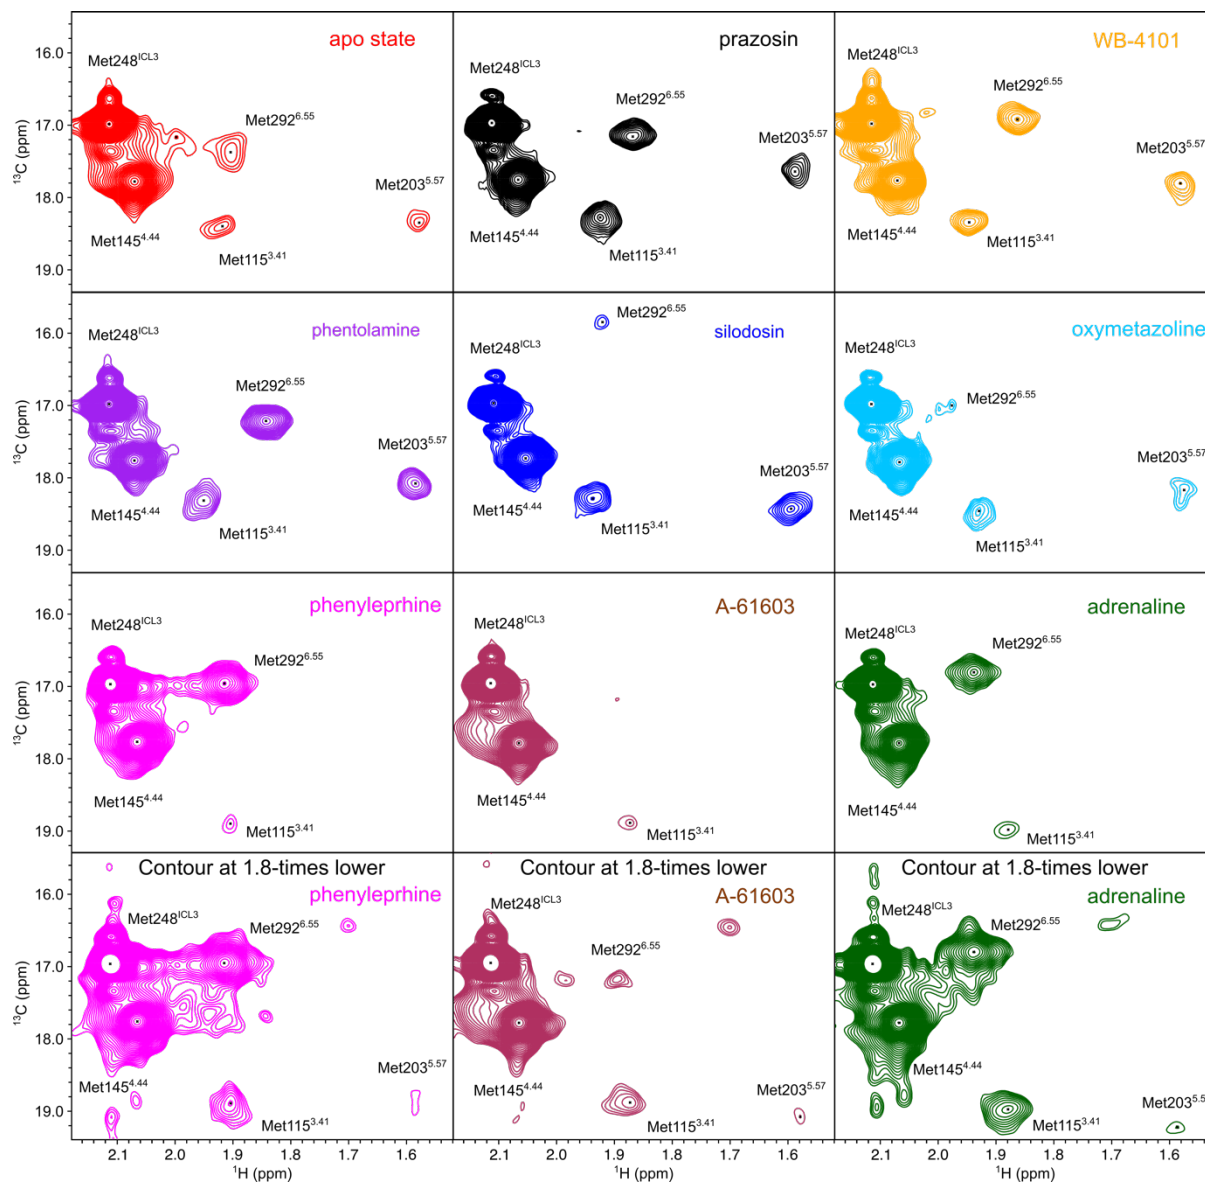

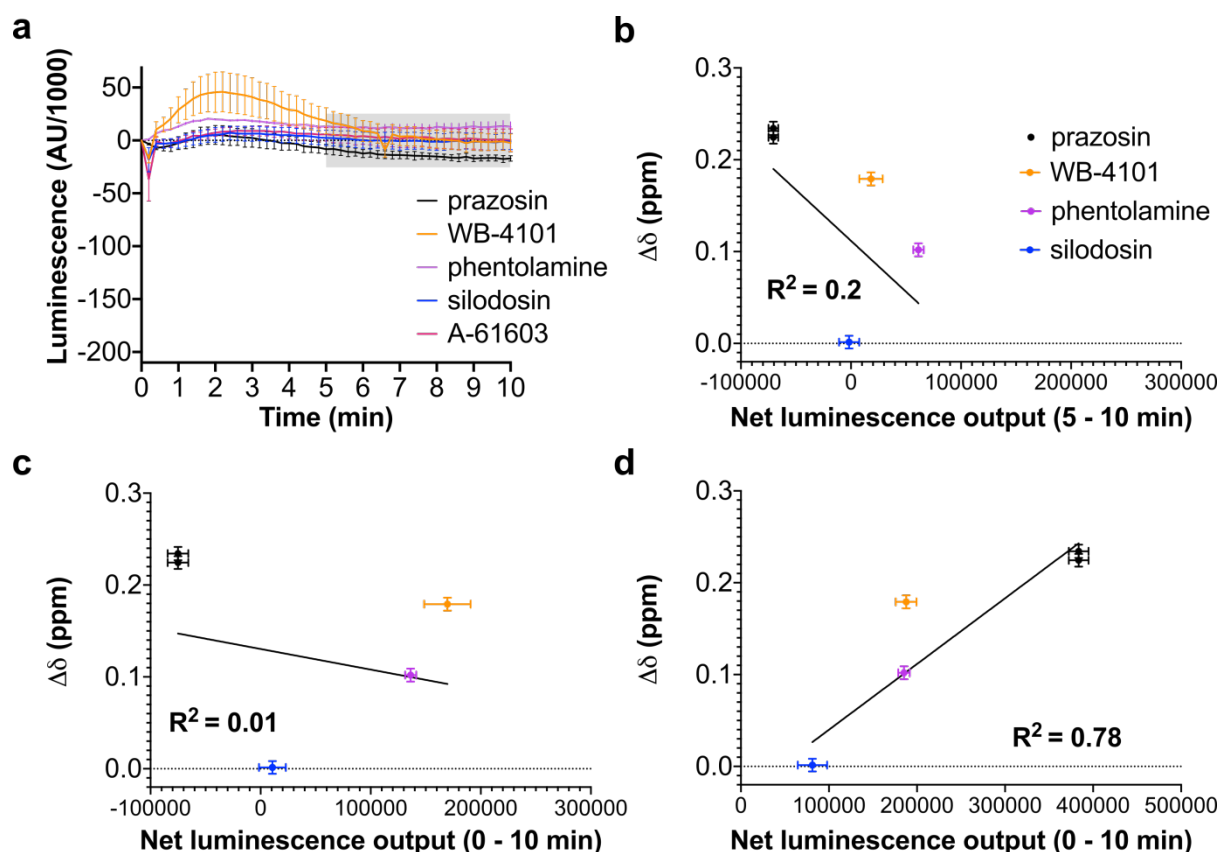

**Supplementary Figure 7. Controls for NanoBit G protein activity assay.** (a) NanoBit G protein activity assay on empty vector (pcDNA3.1/Zeo) transfected COS-7 cells treated with the same concentrations of prazosin, WB-4101, phentolamine and silodosin as in Figure 4b. The grey shaded region indicates where the area under the curve measurements were taken for (b). (b) Linear regression analysis of the average chemical shift differences ( $\Delta\delta$ ) for the  $^{13}\text{C}^{\epsilon}\text{H}_3$  of Met203 in  $\alpha_{1A}$ -AR-A4 (L312F) and the increase in luminescence seen between 5 – 10 min after treatment in the NanoBit assay on empty vector (pcDNA3.1/Zeo) transfected COS-7 cells. A P value of 0.2663 was obtained when testing against the null hypothesis of a slope of 0 (c) Linear regression analysis of the average chemical shift differences ( $\Delta\delta$ ) for the  $^{13}\text{C}^{\epsilon}\text{H}_3$  of Met203 in  $\alpha_{1A}$ -AR-A4 (L312F) and the increase in luminescence seen for the first 10 min after treatment in the NanoBit assay on empty vector (pcDNA3.1/Zeo) transfected COS-7 cells. Ligands are coloured as listed above and a P value of 0.6754 indicated slope not deviating significantly from 0. (d) Linear regression analysis of the average chemical shift differences ( $\Delta\delta$ ) for the  $^{13}\text{C}^{\epsilon}\text{H}_3$  of Met203 in  $\alpha_{1A}$ -AR-A4 (L312F) and the increase in luminescence seen for the first 10 min after treatment in the NanoBit assay on COS-7 cells transfected with wild-type  $\alpha_{1A}$ -AR (as in Figure 4b-c). A P value of 0.0071 suggested a significantly non-zero slope. Ligands are coloured as listed above. In (b), (c) and (d)  $\Delta\delta$  are plotted for two independent titrations of prazosin and silodosin, and single experiments for WB-4101 and phentolamine. Average chemical shift differences ( $\Delta\delta$ ) were normalised using the equation  $\Delta\delta = [(\Delta\delta_{1\text{H}})^2 + (\Delta\delta_{13\text{C}}/3.5)^2]^{0.5}$  and errors were calculated by the formula  $[\Delta\delta_{1\text{H}} * R_{1\text{H}} + \Delta\delta_{13\text{C}} * R_{13\text{C}} / (3.5)^2] / \Delta\delta$ , where  $R_{1\text{H}}$  and  $R_{13\text{C}}$  are the digital resolutions in ppm in the  $^1\text{H}$  and  $^{13}\text{C}$  dimensions respectively.

a

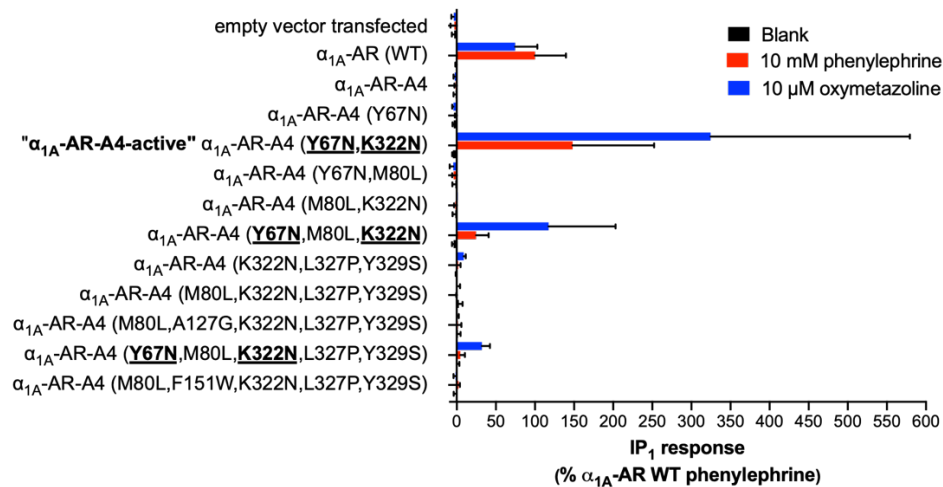

b

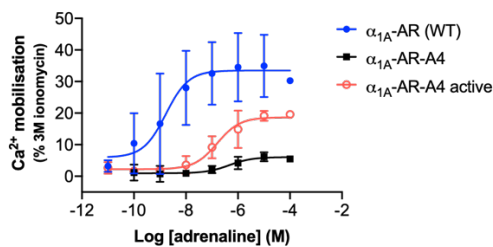

c

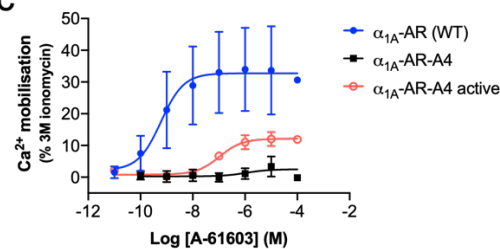

d

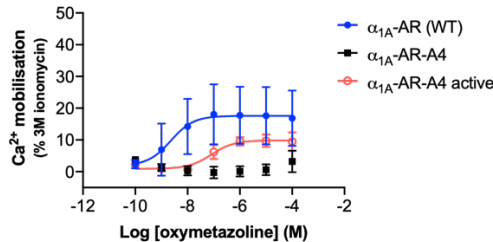

e

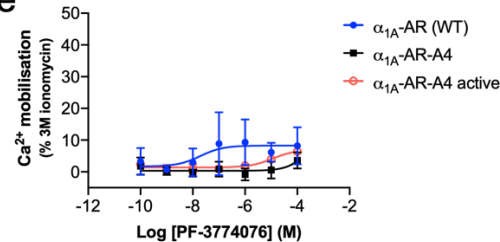

**Supplementary Figure 8. Functional signalling assays performed on  $\alpha_{1A}$ -AR-A4 active and other mutants.** (a) Measurement of agonist (phenylephrine and oxymetazoline) induced accumulation of IP<sub>1</sub> in COS-7 cells transfected with WT  $\alpha_{1A}$ -AR,  $\alpha_{1A}$ -AR-A4 and mutants that were made with reverted mutations on  $\alpha_{1A}$ -AR-A4. Y67N, M80L, A127G, F151W, K322N, L327P and Y329S are the predicted critical back mutations that were screened to recover the signaling ability of  $\alpha_{1A}$ -AR-A4. All of  $\alpha_{1A}$ -AR-A4 back mutants containing Y67N and K322N (highlighted with bold and underlined) displayed accumulation of IP<sub>1</sub> signal upon agonist activation.  $\alpha_{1A}$ -AR-A4 (Y67N, K322N) is labelled as  $\alpha_{1A}$ -AR-A4-active. In this screening assay some mutants were only measured in one biological replicate experiment ( $\alpha_{1A}$ -AR-A4 (M80L, K322N, L327P, Y329S);  $\alpha_{1A}$ -AR-A4 (K322N, L327P, Y329S);  $\alpha_{1A}$ -AR-A4 (Y67N, M80L, K322N);  $\alpha_{1A}$ -AR-A4 (M80L, K322N);  $\alpha_{1A}$ -AR-A4 (Y67N, K322N);  $\alpha_{1A}$ -AR-A4), with the others measured in two independent biological replicate experiments, with data plotted as mean  $\pm$  SD of replicate measurements. (b-e) Measurement of adrenaline (b), A-61603 (c), oxymetazoline (d) and PF-3774076 (e) induced Ca<sup>2+</sup> mobilization in COS-7 cells transfected with  $\alpha_{1A}$ -AR (blue, solid circles),  $\alpha_{1A}$ -AR-A4 (black, solid squares) and  $\alpha_{1A}$ -AR-A4 active (red, open circles). Data represent the mean  $\pm$  SD from three independent biological replicate experiments, each measured as three technical replicates.

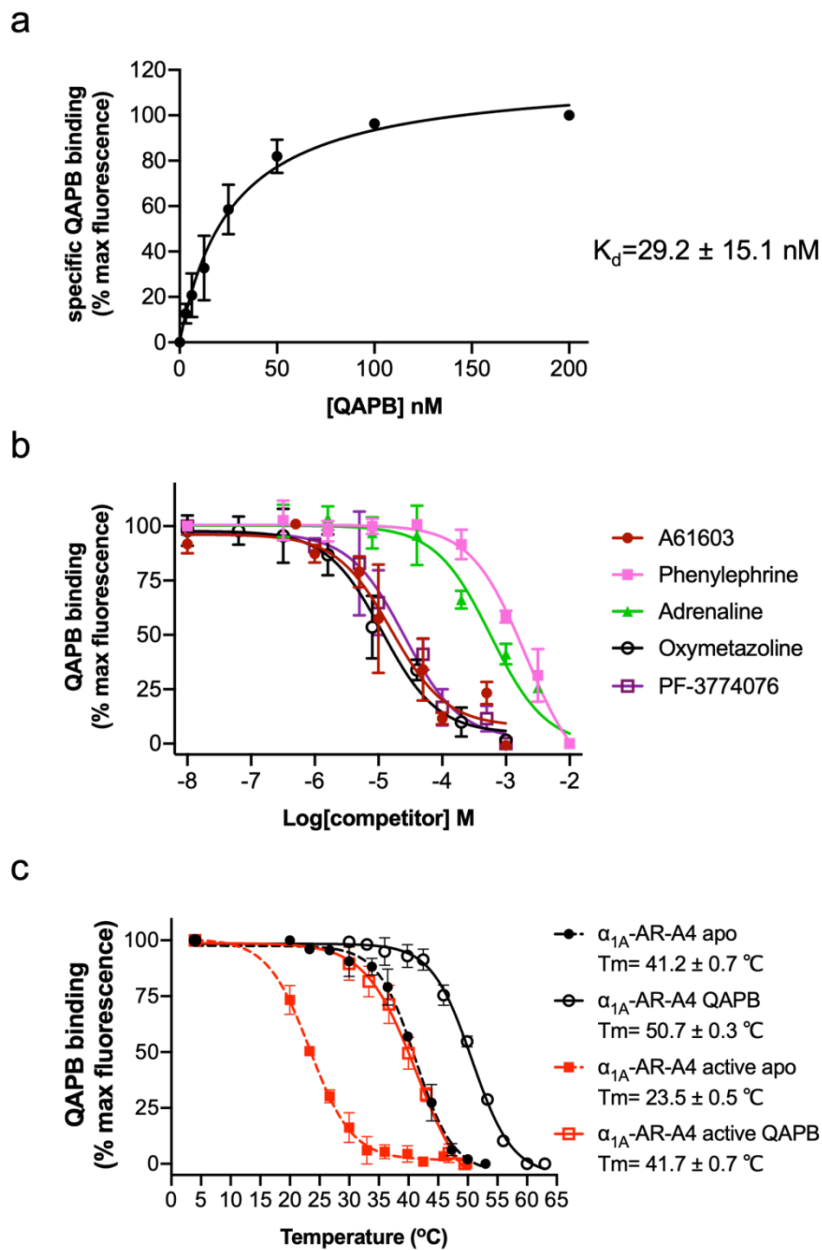

**Supplementary Figure 9. Characterisation of  $\alpha_{1A}$ -AR-A4-active.** (a) Saturation binding of QAPB to purified  $\alpha_{1A}$ -AR-A4 active. (b) QAPB competition binding for 2 hours at 22 °C against purified  $\alpha_{1A}$ -AR-A4 active with A-61603 (maroon, solid circles), phenylephrine (pink, solid squares), adrenaline (green, solid triangles), oxymetazoline (black, open circles), PF-3774076 (purple, open squares). (c) Thermostability assay performed on  $\alpha_{1A}$ -AR-A4 in the apo state (black solid circles and dash line), QAPB-bound state (black open circles and solid line) and  $\alpha_{1A}$ -AR-A4-active in the apo state (red solid squares and dash line), QAPB-bound state (red open squares and solid line).

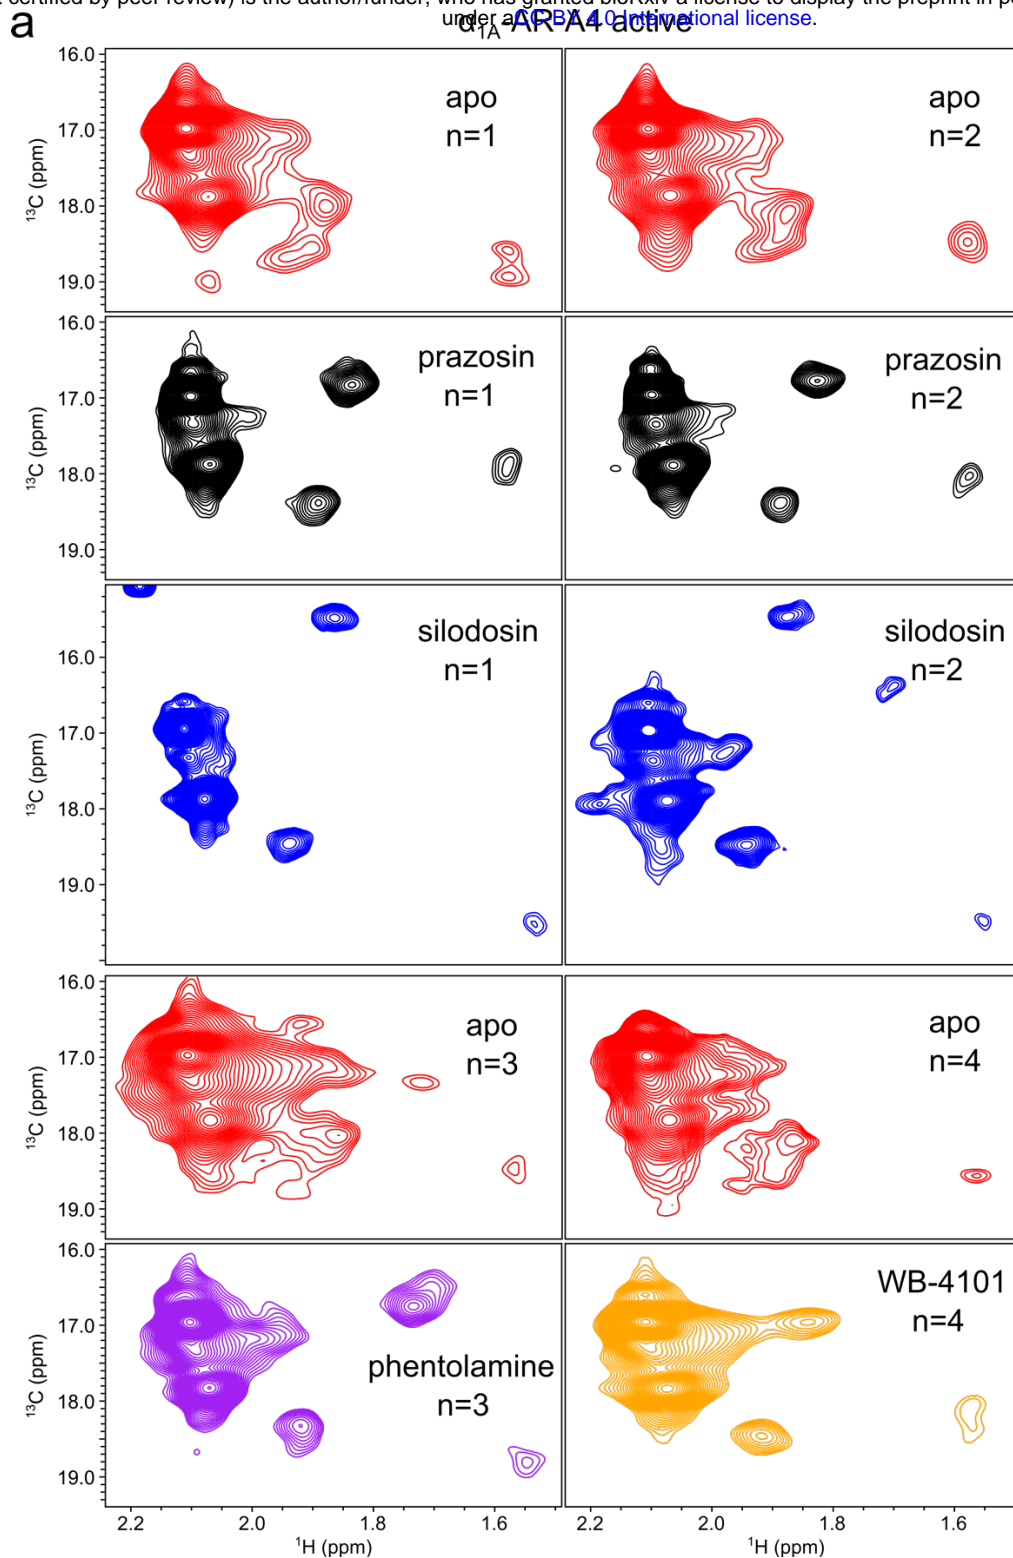

b

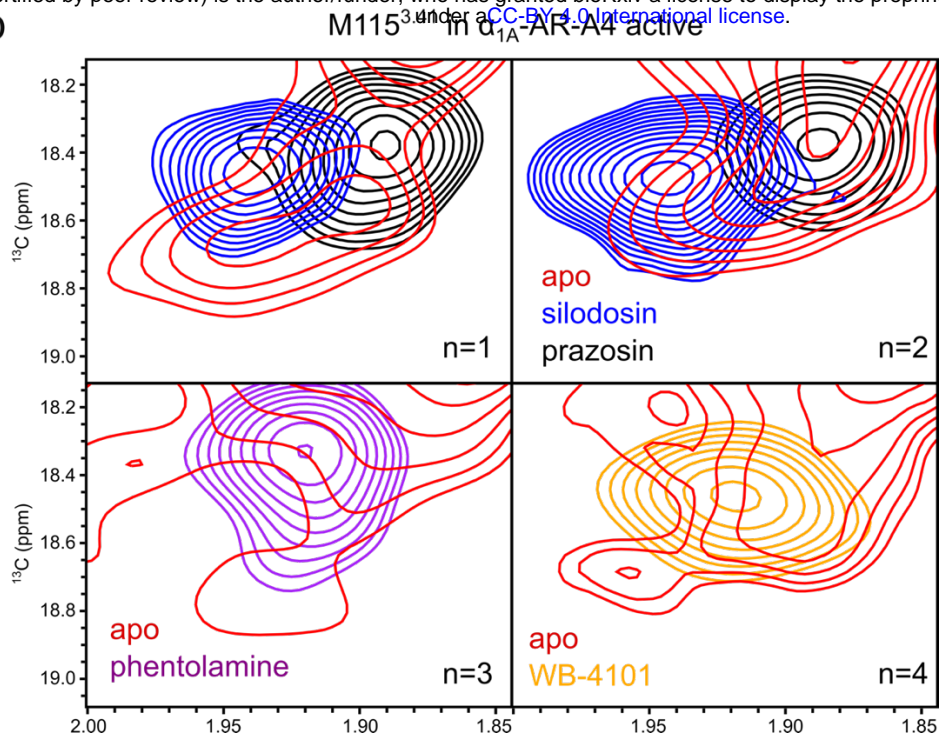

**Supplementary Figure 10.  $^1\text{H}$ - $^{13}\text{C}$  SOFAST-HMQC spectra of  $\alpha_{1A}$ -AR-A4-active.** (a) Four separate expressions and purifications of  $\alpha_{1A}$ -AR-A4-active were conducted and data acquired for apo- (red), prazosin (black) and silodosin (blue), phentolamine (purple) and WB-4101 (orange). (b) Expansions and overlay of the region where the  $^{13}\text{C}^{\epsilon}\text{H}_3$  of Met115 resonates.



**a**

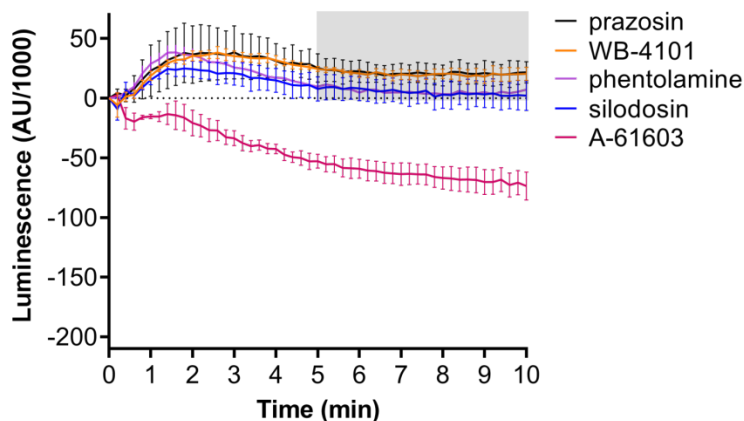

**b**

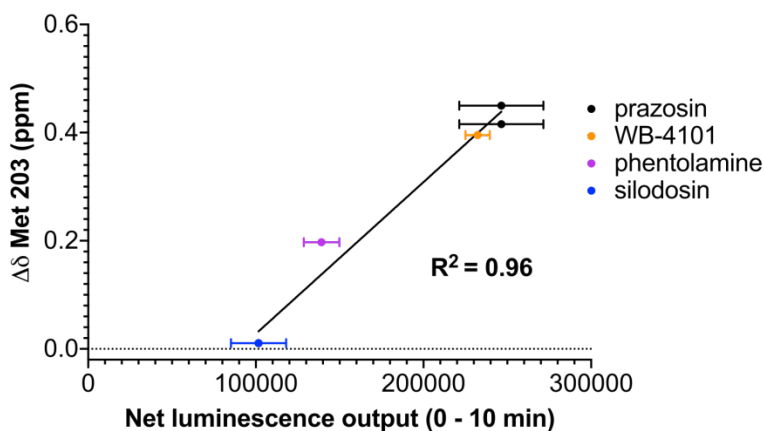

**Supplementary Figure 11. Correlation between the chemical shift position of Met203<sup>5,57</sup> in  $\alpha_{1A}$ -AR-A4-active and inverse agonists efficacy.** (a) NanoBit G protein activity assay demonstrating inverse agonism of prazosin, WB-4101, phentolamine and silodosin at  $\alpha_{1A}$ -AR-A4 active expressing COS-7 cells. The grey shaded region indicates where the area under the curve measurements were taken to make Figure 5e. (b) Linear regression analysis of the average chemical shift differences ( $\Delta\delta$ ) for the  $^{13}\text{C}^6\text{H}_3$  of Met203 in  $\alpha_{1A}$ -AR-A4-active and the increase in luminescence seen over the first 10 minutes in the NanoBit assay for each antagonist. A P value of 0.0002 suggested that the slope was significantly different from zero. In (b)  $\Delta\delta$  are plotted for two independent titrations of prazosin and silodosin, and single experiments for WB-4101 and phentolamine. Average chemical shift differences ( $\Delta\delta$  Met 203) were normalised using the equation  $\Delta\delta = [(\Delta\delta_{1\text{H}})^2 + (\Delta\delta_{13\text{C}}/3.5)^2]^{0.5}$  and errors were calculated by the formula  $[\Delta\delta_{1\text{H}} * R_{1\text{H}} + \Delta\delta_{13\text{C}} * R_{13\text{C}} / (3.5)^2] / \Delta\delta$ , where  $R_{1\text{H}}$  and  $R_{13\text{C}}$  are the digital resolutions in ppm in the  $^1\text{H}$  and  $^{13}\text{C}$  dimensions respectively.

## Reference

1. Yong, K.J. et al. Determinants of Ligand Subtype-Selectivity at alpha1A-Adrenoceptor Revealed Using Saturation Transfer Difference (STD) NMR. *ACS Chem Biol* **13**, 1090-1102 (2018).
2. Hwa, J. & Perez, D.M. The unique nature of the serine interactions for alpha 1-adrenergic receptor agonist binding and activation. *Journal of Biological Chemistry* **271**, 6322-6327 (1996).
3. Willems, E.W. et al. A61603-induced vasoconstriction in porcine carotid vasculature: involvement of a non-adrenergic mechanism. *Eur J Pharmacol* **417**, 195-201 (2001).
4. Shibata, K. et al. KMD-3213, a novel, potent, alpha 1a-adrenoceptor-selective antagonist: characterization using recombinant human alpha 1-adrenoceptors and native tissues. *Mol Pharmacol* **48**, 250-8 (1995).
5. Conlon, K. et al. Pharmacological properties of 2-((R-5-chloro-4-methoxymethylindan-1-yl)-1H-imidazole (PF-3774076), a novel and selective alpha1A-adrenergic partial agonist, in in vitro and in vivo models of urethral function. *J Pharmacol Exp Ther* **330**, 892-901 (2009).
